# Supplementary material for: Characterization of the Fatty Acid Desaturase Genes in Cucumber: Structure, Phylogeny, and Expression Patterns
Source: PubMed Central journal article supplement (PMC4777478; doi:10.1371/journal.pone.0149917), 2016-03-03
Supplement: pone.0149917.s003.pdf [file pone.0149917.s003.pdf]

## Supporting Information

>CsFAB2.1

```
1      AAAAAAGCCCATTTTATAGAGAGAGAAGGAAAAAGAGAAAAAGAAAGAGAAAAGAGAGGAATTGAGGTCGAAAGTGGCCATTGCCGGCAGGT
91     AGTCTTAGCATCACATTCATTCACATACGTAAGTGGCCCTCGGTTTCTTCAACTCCGGCTCCGGTATCTTCTTCTCCTTTCTTCCACGT
181    ACTGTTTTTCCGACTAACTCACCTGAATATTCACCGTTGATTACGGAGCTACTCTGAAAATGGCGCTCAAATTCATCCTCTCACCTCTC
1      M A L K F H P L T S
271    AATCTCCTAAGTTGCCGTCCTTTGCGATGCCGAGCTTGCAAGTCTCAGATCTCCTAAGTTTGTATGGCCCTCACCTCCGCTCCACCT
11     Q S P K L P S F A M P Q L A S L R S P K F V M A S T L R S T
361    CCAGgtaacttccttttcttttctctcattctctcttttttttaatgcttttcagatcctttgtgaatccttttggttatgtgttccct
41     S R
451    tgttttgcatgcttatcattctgttaactctgttttctgtctctgtatatactgttcttccggttcaatttcgaggactgatgttttggt
541    gctaataaatttatcgatttatcattacctcgattgacatttagttgcatggttgccgctttgttctgtgattttctgcttccat
631    gtgttgcctctctgctgattctccgctgatttctctctgtatgctgttccctccaagaatttgatcttcagttagttttgtgttcc
721    attggaatttcagatcttttctctcattctctcattttttgacgattgctgtctgatctcttttttcaaatggagtgtgcatggaatgg
811    tgatgagcatggaggtttttcagtgatattttttgttctgtctccgctctctgttctctattacatacactcgactgagtgattat
901    ggatcattcctgctagaacgaacaggcttattccgttttgactcttcgaaatgaaattagatgttcaatttttctttgacagtgatga
991    attcgaactgtagttaattgtgtggttgcatgactgtccattcgttattctttgtgtatttaggcagcgttgtgttcagtgctctgtctt
1081   tttttggaggcttctgtgtcaggtctgtccttggaattttcgtgcttaacttgattgcttttctttatgatggtgcatcatcatcgcc
1171   tcttgatgctccagcatttatgaggattctctcctcctcctcatttattccatatactgtgctgtctctctctctatattggttaaaa
1261   cctttaagagaccaaaattcttttggtgtaaatctttatcttaataccaactctttacttgtcagcacttcaaaaacaacctctgtttg
1351   aagtacctgaaggattaacatttagctacctggttaaaaaactgacataatggaaacataacttaattgtctttatgacgatgatgtgg
1441   ccattttgtgtgacgctctctctcgatccatgaggtcttttgacagaatgctctggacagcattttaattctgagacttaccattt
1531   gcattgagaaaacgcttaattgaaatagaagttctagaagctaccatataatctgctattcagtgatgtgatatactctgttcattaact
1621   tttttaactgtgtgttttgtaaaatccagGGAGGTTGAGACGCTTAAGAAACCTTTTATGCCTCCAAGGGAAGTGCATCTCAAGTAAC
43     E V E T L K K P F M P P R E V H L Q V T
1711   TCACTCAATGCCACCCCAAAAGATGGAGATATTTAAATCTTTGGAGGACTGGGCTGAAGAAAACCTTTTGGTTCATTTGAACCAGTGGA
63     H S M P P Q K M E I F K S L E D W A E E N L L V H L K P V E
1801   GAGGTGTTGGCAACCACAGGACTTTCTGCCAGACTCGGCATTTGAGGGATTTACAGAGAGGTCGTTGAGCTTAGAGAGAGGGCAAAGGA
93     R C W Q P Q T D F L P D S A F E G F H E Q V V E L R E R A K E
1891   ACTCCTGATGATACTTTTGTGTTTGTAGTTGGAGACATGATTACAGAGAAGCCCTTCTACTTACCAGACAATGCTGAATACTTGGGA
123    L P D E Y F V V L V G D M I T E E A L P T Y Q T M L N T L D
1981   TGGAGTCAGGGACGAAACAGGACAGCCCAAGCCCAAGCCCTTGGGCAATTTGGCAAGGGCTTGGACTGCTGAAGAGAACAGACATGGTACCT
153    G V R D E T G A S P T P W A I W T R A W T A E E N R H G D L
2071   TCTGAATAAATATCTTTACCTATCTGGACGAGTGGACATGAGGCAAGTTGAGAAAACAATTCAGTATTTGATTGGATCGGGAAATGgtgag
183    L N K Y L Y L S G R V D M R Q V E K T I Q Y L I G S G M
2161   atccgctcaaacatcaaaatctttcttttctcttatagctatatttgcattaaaaaattaacctgaacccataaaatacactatgcacaa
2251   aaaggctgatgagtgacagattgtccacactcccttgagtatttaattccttccattctctgtgtttctgacgatgagtcctgcatgc
2341   attctgtctgataactgataaaccagtttaaaattatattgagtcagttgttctctcataaagatttttttggcagaattctctcttta
2431   gctggacatcagaattcccatatgttcaacaacttatgtagttgtaaaattagttggtatattaaagtaattatcattggagatgctat
2521   gagtatttgaaccttttagccttttaggttgatcttttaggtgtaggctcttcaatataatttaaaccttctcattttataaattctt
2611   atggattgtgttatagGACCAAGGACTGAAAACAATCCTTACCTAGGATTTATATACACCTCATTTCAAGAAAGGGCAACCTTCATCTC
211    D P R T E N N P Y L G F I Y T S F Q E R A T F I S
2701   CCATGGGAACACTGCCAGACTAGCAAAAGAGCACGGAGACATAAAGTTAGCTCAAATATGTGGAAACAATCGCTGCAGATGAGAAGCGACA
241    H G N T A R L A K E H G D I K L A Q I C G T I A A D E K R H
2791   CGAGACTGCATATACAAAAATGTCGAAAAGCTCTTTGAGATAGACCTGAAGGAACGGTCATAGCTTTTGAAGACATGATGAGGAAGAA
271    E T A Y T K I V E K L F E I D P E G T V I A F E D M M R K K
2881   AGTCTCAATGCCTGCTCATCTGATGTACGATGGCCGCGACGACAACTTGTCCATCACTTCTCAGCAGTTGCACAGAGGCTTGGAGTTTA
301    V S M P A H L M Y D G R D D N L F H H F S A V A Q R L G V Y
2971   CACAGCAAAAGACTACGCAGACATATTGGAGTTTTTAGTTGGGAGATGGAAGGTGAAAGTTTGAAGTGGACTGTCAGGCGAGGGGCGAGAA
331    T A K D Y A D I L E F L V G R W K V E S L T G L S G E G Q K
3061   GGCTCAGGATTATGTCGCTGCAAGAAATTAGAAGCTAGAAGAAAGCTCAGGGACGGGCAAAAGAAAGGCTCCTACCATTCC
361    A Q D Y V C A L P A R I R K L E E R A Q G R A K E G P T I P
3151   TTTAGTTGGATTTTCGATCGACAGGTTAAGCTGTAGAAGGTTGAATGGAGTAGGAAGGAAGAGAATGTGTAGAAGAGGATGTGTGGG
391    F S W I F D R Q V K L *
3241   TAAGGGAAGAAAGAAAAAAGAGCAGAAATCATCATTTGGTGTACTTTGTCTTTTAAATGTGTGGAAGAACAATAATGGTCAGTATCA
3331   TCTTCTTGTCTGTTTTGTCCATTCTTCTCTCTCTCTCTCTCTCATCAAAAAAAGGGAAAAAATTTGTGTATTGTCAG
3421   TGTAGATACAGTATTTTATGCGTCGATCTGTTTGGTTTGGTGTGATAGATGGTAGGAAGGTAATGGCAGTGTGTTTGTGTGTGTGTG
3511   TGCTTTAGTTTTTGTCACTTTTACTTCATAATGTAATAATCTGTTTCTTGGTGTATCAGAACAATCTACAATTTTGATCACTAATCTTT
3601   CCATCTCTCGCTCCAAAGACAGGTTTTTCTCGTTTTAAAAAGAGAAGTTTTAGAAATCC
```

>CsFAB2.2

1 TTCCCTCTTTCTTTCTTTATATTTCCCTCTCTCTCGCCGATCCCCCAACTCTCTCCTCCATAATGGCTCTCAAGCTCAATTCCCC  
1 M A L K L N S P  
91 ACTGAAACTCCCATCTCACAATCTCCCTTCCATTCCCTTCCCATCGCAGATCTCCAACCTCTCCTCATGGCTCTCCACTCTCCACTC  
9 L K L P S H N L P S I P L P H R R S P T L L M A S S T L H S  
181 TCTCTCCAAGtaagatctaaccttcccattttctctctctctctgttccatcaattttcttttattctactgcctatcatcccacttcc  
39 L S K  
271 cttttacttttcttttactgtattctgattttattcgttcaatcttcaccgatttctaactctgaaattgcttattttctctcatattgcg  
361 ttccttggaaatctccgcctacatcaatcaatcaagctatatagtgagacgatttttgtattaataatgtaatttttgtctgaagaaagag  
451 gcatttttcagagattgtttttgtacttgcaagaaatctccagaaggatggattttttttcacagaatttctaatttagttatttttt  
541 taattgccaataactacaacgtttataaaatgattttgcaatagcatcgattctttttccctttttatgctgattctttccaaacggatct  
631 atcagctcttttgtgtttttttctccctctcttttttagttattgtttattgttaggtcattgtgatagcagagtcggtttgtttat  
721 attataataatattgtgtatgtatataaaagttaaattataatctcaattacgtttgcaattgtgaatttagaattttcaattctgttta  
811 aatcttggcccttcagaaaaatttaattaaaagttacattttgctcattccatgacgatgtggaattgtggaggatgtgacatcaat  
901 aatttctattaagaaaatttggatttatttttctaaacatagttttctttgaaaattacgcagccacatactttcactcttgagta  
991 atagcttttattctttctcgattctctcattttatctggttgagtttttagccaaattttggaaatacaacagttttttgtgaga  
1081 ttgcttttttaagtcttagaagcttgctattacttttaaatcgtttctggaatgaagaactaaacattaagaaaataataactcgt  
1171 ttttcagcctaaattgagaaccttaagagctcaccttaataaaaatacaattacatttaaaaagttgtacaaaactaattaaatgtaa  
1261 tcacgattcacaactaaataatgtagttagcttctttctgtttctttctatggtcgtctaattgtttgtttatggctgaag  
1351 tcatgtcctatagactatagttgcttctactaactaccgctctattggcttcttcatactacatttccatcaatttggatcttagcag  
1441 gtgcaatcgccccattcaggttttagcttttctgtgagtggaagtgtgtgtaaaactgtattctgagactctcgtatgtgactgagtt  
1531 ttgatggccatcttcttttctaactattcttaataattgttaactgtgaaatgaactgaatcatacatctgagactgacatcactggt  
1621 gcttattctattttacagATCGACTGAGGGATCAAAGAAGCCAAATTTCCCTCCCGGGAAGTGCATGTCCAAGTGACTCATTCCATGCC  
42 S T E G S K K P N F P P R E V H V Q V T H S M P  
1711 ACCTCAAAAGATGGAGATCTTCAAATCGTTAGAAGACTGGGCAGAGAATAACATCTTGGTTCACCTAAAGCCTGTGAAAAGTTGTTGGCA  
66 P Q K M E I F K S L E D W A E N N I L V H L K P V E S C W Q  
1801 ACCTCAGGATTATCTCCAGACCCAGAATCTGACGGTTTCTACGACCAAGTCAAGGAAATAAGGGAGAGATCGAAGGATATTCCTGATGA  
96 P Q D Y L P D P E S D G F A Y D Q V K E I R E R S K D I P D D  
1891 CTATTTTGTGATGTGGTGGTACATGATTACCGAAGAGCGCTTCCAATTATCAGACAATGCTGAACACCTCGATGGTTCGTGA  
126 Y F V M L V G D M I T E E A L P T Y Q T M L N T L D G V R D  
1981 TGAGACGGGTGCAAGCCTCACCTCGTGGGCAATTTGGACAAGAGCATGGACTGCGGAAGAGAATAGACATGGTGACCTTTTGAATAAGTA  
156 E T G A S L T S W A I W T R A W T A E E N R H G D L L N K Y  
2071 CCTTTACCTGTCAGGACGAGTCGATATGAAGCAGATTGAAAAGCATTCCAGTACCTTATGGATCAGGAATGgttaggtttctcgtctt  
186 L Y L S G R V D M K Q I E K T I Q Y L I G S G M  
2161 ctgaaaaataacttttgtttcgttttctttgaacaatttactgtgacctggaagtagagatttgtgtgcaactgaaactcacaattcaa  
2251 ctcataagtactataagtcatgcgagaaaatttacttgcaaaaactaagaaaatattaactttatgaacatcaactaagcatgtttccat  
2341 tgaagttgtgtctttaaattgtagagaacacttttcaaaaactctcaaaatagcacctatgtcttttcaaatgtgtggtttgttagaat  
2431 tctgagttcaaacattagaactttgttagttgttagggatttaattgggtacttcgaactcttttagtggttttacagttaacagtat  
2521 cggatttgatggtaaatcatagtgagtagtgaacttctgcttcaacataatgttctttgctgcttgctgagtggttagaatagttccat  
2611 tgttacattttcagcttgatgtttttgtgtaacttttgattgtacatttagtatctgtctgtgaccatagtttattataaagatttta  
2701 tgggtttctcttttagattcaaatgaaacctgggtttgttttgtgaccttttagGATCCCAAACCGAAAACAATCCATACCTTGG  
210 D P K T E N N P Y L G  
2791 TTTTACTACACCTCATTTCAGAGAGGGCAACTTTTCATCTCCCATGGAAACACTGCTAGGCTGGCCAAGGAACATGGTGATTTTAAGTT  
221 F I Y T S F Q E R A T F I S H G N T A R L A K E H G D F K L  
2881 GGCACAGATATGTGGTATAATTCATCTGATGAAAAACGTCATGAAACCGCATATACCAAGATTGTTGAGAAGCTCTTTGAGGTTGACCC  
251 A Q I C G I I A S D E K R H E T A Y T K I V E K L F E V D P  
2971 TGATGGCACAGTTATGGCTTTAGCTGACATGATGAAGAAAAAATTTCCATGCCAGCCATTTGATGTACGATGGACAGGATAACACCT  
281 D G T V M A L A D M M K K K I S M P A H L M Y D G Q D N N L  
3061 TTTTGGACTTCTCATCTGTGTCTCAGCGGCTCGGAGTTTATACTGCTAAAGACTATGCTGACATTCCTGGAGTTCCTCGTTAGCAGATG  
311 F E H F S S V A Q R L G V Y T A K D Y A D I L E F L V S R W  
3151 GAAAATAGAGAATTTGACAGGTCTCTCGGGTGAGGGACGCAAGCACAAGATTTCTGTGCGGTTTGGCCCAAGGATTAGAAGGCTGGA  
341 K I E N L T G L S G E G R K A Q D F V C G L P P R I R R L E  
3241 AGAGAGGGCTCAAAGCAGAGCAAAAACAAGCACAAGAGTCCATTTAGCTGGATCTTCGGTCGAGAAAATCAAGTTTAAAGGGCAACGGTC  
371 E R A Q S R A K Q A Q R V P F S W I F G R E I Q V \*  
3331 TTAAGGAAGGTGTTAAACTACTTGACTCAACTTGACAGAGGCTTTTCCAGACGACATTGCAATACAAAATCGGAAGCGTTTTCATCTTTA  
3421 GGTACTACTTCAAATCCTAATTTGTTGAAGGGAAAAGTATGTAGATCAGACTGTCTTGTGCTGCTGTGATTTGTTGATGCAACAACT  
3511 ATGTCACTTCCAGCTCCTTATTTCTTTAGAAGAAAAGGATCAATATGGCTTGTGTTTCTCGTACCCAAATAGAACGCCTAGT  
3601 AAGTTTCAACTGTTGTAATCACCAAACCATCTATAAATTTGGCAAAAAAATCCTAGTTGCACTTTTGCCTTATTATCTGTCC

>CsFAB2.3

1 TTTATAAATATATTAGTGCATTTCCCTCTTCCAATTGCCCCAGAATTTCTACTTCCACGAAATAATACAACACACCCATCCTCATCATGCA  
1 M Q  
91 AACACTTACCTCAAACCACCTTCCCCTTACCCGGAATATCCCTCACTTCCGCCTCAACTCCCCCGCCACTCTACCGCCTCAAATCTCC  
3 T L T S N H L P L T R N I P H F R L N S P P P L Y R L K S P  
181 AATTCAGCCATTGCGGCCCGCTCTGGTTAAGCATCGGAGAATGCACTCAATGCCCCCGAAAAGATCGATGTCTTCAAGTCTTGGGA  
33 I S A I A A P P L V K H R R M H S M P P E K I D V F K S L E  
271 AGGTTGGGCAATGACAATGTGCTGCCGCTGCTGAAGCCGGTGGATGACTGCTGGCAGCCCCAGGATTCTTGCCTGATTCTACTCTGCC  
63 G W A N D N V L P L L K P V D D C W Q P Q D F L P D S T L P  
361 CTACGGGGAATTTGTGGAGGAAGTCAAGGCTCTGCGGGATCGGACGGCGGAGCTGCCGGATGAGTACTTTGTGGTGTGGTTGGGGATAT  
93 Y G E F V E E V R A L R D R T A E L P D E Y F V V L V G D M  
451 GATTACGGAGGATGCATTGCCACTTATCAGACCATGATTAATACGCTGGATGGAGTTAAGGATGAGACTGGGGCTAGCCAGAGCCCCTG  
123 I T E D A L P T Y Q T M I N T L D G V K D E T G A S Q S P W  
541 GGCTACCTGGACCCGGAATTGGACCGCAGAGGAGAACCGGCACGGCAGCTTGCTCCGGACATACCTTTATTTATCCGGTCGAGTTGATAT  
153 A T W T R N W T A E E N R H G D L L R T Y L Y L S G R V D M  
631 GACGATGATTGAACGGACTGTTCAATTTGATCGGCGCGGCATGgtgagaccaattccccttaattatttctaatttaatttaacga  
183 T M I E R T V Q Y L I G A G M  
721 aaattatttgatttttcaacttttgaaaattacattttattttgtcaaacacagaattcaatttgatttatacagattcactcgtaa  
811 ttttttttttaaaaaatgattgaatttgataaagttgatgactacttattactaatgagagttcttttttagaaaaagaattag  
901 aacaaacttgtaattaaagtgatttataacatgtaattattagttcatttttaagtcgggtgttttttttaatttttattaatgt  
991 ttacttttaattacatttaggatgcatgctttttccaaaatttaagttgaatagtttaggaaggtgtaattaataaaatttgttt  
1081 ggaagcaaagaagtaaaacaggagatgaaaaacgaatttgaaatacaccaatcctgggaataagttttttatataaaaaagaagaaac  
1171 gattgaatgaataaaattatattgtaacaatggagatggaatgtgaatacgtgggaggtgggcagGATCCAGGAACGGAGAATAACCCA  
198 D P G T E N N P  
1261 TACCTAGGATTCGTTTACACCTCATTTCAGAGCGAGCCACGTTTCTCACGGCAACACCGCTCGCTTAGCCAAACACAACGGCGAT  
206 Y L G F V Y T S F Q E R A T F I S H G N T A R L A K H N G D  
1351 CCAGTCCTTGGCCGATCTGCGGCACCATCGCCTCCGACGAGAAGCGCCACGAGAACGCATATTCAAGAATCGTCCAGAAGCTTCTAGAG  
236 P V L A R I C G T I A S D E K R H E N A Y S R I V Q K L L E  
1441 GTGGACCCACAGGAGCCATGCTGGCAATAGCTGACATGATGCAGAAGAAGATCACCATGCCGGCTCACCTTATGTACGACGGGCAGGAC  
266 V D P T G A M L A I A D M M Q K K I T M P A H L M Y D G Q D  
1531 CCGAGGCTATTCGACCATTCTCTGCCGTGGCTCAGCGCCTTGAATCTACACGGCTAATGACTACGGGACATTCTGGAGGTACTGATC  
296 P R L F D H F S A V A Q R L G I Y T A N D Y A D I L E V L I  
1621 CAACGGTGGGGTTGGAGAAAGTGGAGGATGGATTGACGGGGAGGGGCGACGGGCTCAGGATTACGTGTGTGGGTGGGCCCCAGGATT  
326 Q R W G L E K V E D G L T G E G R R A Q D Y V C G L A P R I  
1711 AGGAAGCTTCAGGACGAGCCGACGAGCGGGCTAAGAAGTTGAAGCCCCATGGGGTCAAGTTTAGCTGGATTTTAAATAAGGAAATCCC  
356 R K L Q E R A D E R A K K L K P H G V K F S W I F N K E I P  
1801 ATCTCTCCTAGGTGGTTCTCACTTGTAGCTTTGTTTTGTTTTTTCTTTTCCTTCTGTAATTTAAATTTAGATTTAAA  
386 I L S \*  
1891 TTTAAATCTTAAACCCAAAACCTTCAAAAATAAAAATAATTGAAATCTTGTTAATTTA



>CsFAD2.2

1 ATGAGGAAAGGAAGCCCAAATAGAAGCAAATTAGCATTGGGGGAGCGCATTACACACACCAAGCCTCCCTTCACCATCACACAAATCAAG  
1 M R K G S P N R S K L A L G E R I T H T K P P F T I T Q I K  
91 AAATCCATTCCATCCCATTGCTTCAATCGTTCCCTCTACCGCTCCTTCTCTTACGTTATCTTCGACTCCATCCTTCTCTACTTTTAT  
31 K S I P S H C F N R S L Y R S F S Y V I F D S I L L S T F Y  
181 TACGTAGCCACCACCTATTTCCACACCCTTTCCGCCCACCCTACTGCTTACTACTTAGCTTGGCTCTTTATTGGCTCTCTCAAGGC  
61 Y V A T T Y F H T L S A H P L L L H Y L A W P L Y W L S Q G  
271 ATTGTCTTCACCGGCTTCTGGGTCATCGCTCATGAATGTGGCCATCATGCCTTCAGTGATTACCAATTCCTAGATGACTTCCTTGGCTTC  
91 I V F T G F W V I A H E C G H H A F S D Y Q F L D D F L G F  
361 CTCCTCCATTCTCCCTCCTCATCCCTTACTTCTCTTTCAAATCAGCCACCGCCACCATGCCAACACTGCATCACTCCACCGCGAC  
121 L L H S S L L I P Y F S F K I S H R R H H A N T A S L H R D  
451 GAGGTCTTTGTCGCCAAGCCCAAATCCAAATCCCTTGgtatggtgttaattaggtttaatatcattattaataacatgatggatggt  
151 E V F V P K P K S K I P W  
541 tatatgaggcacaacatagaaactgatgtgagaatagatgataccttattttctaaaaacagatatgaatatatatttttatta  
631 aaaaattcaagatatgagaacccctaataatgctttctcaaatctctctatcttctctatgaatcactctctaaaaactattggttttcat  
721 ggatcaaagtatgctattctaaactcatgttattgtgaaaattatctagtccaatgtgtctcttatttttatataatgaagctttc  
811 tatggtgtataatcatgaagttaaaatttacagGTATTTCAAACACTTAACCAACCCACCTGCTAGACTCTTCATTATGTAAATGACCCT  
164 Y F K H L T N P P A R L F I I V M T L  
901 CACACTTGGCTGGCCAATGTACATAGCCTTCAACAATTCAGGCCGAGTCTATGATAGATTACCAGCCACTACGATCCAAACAGCCCAAT  
183 T L G W P M Y I A F N N S G R V Y D R F T S H Y D P N S P I  
991 ATTCACCGAAAAGGAACGACTTCAAGTTCAAATATCCAATGCCGAGTCTTAACCATTTATACTTACTTTACAAACTCGCAGTTACAAA  
213 F T E K E R L Q V Q I S N A G V L T I L Y L L Y K L A V T K  
1081 AGGAATCACGTGGGTCATTGCGATATACTTACTGCCCTTTAACGGTTATGAACGTGTTTGTGGTGTGATATCATGTTTACAACACACACA  
243 G I T W V I R I Y L L P L T V M N V F V V L I S C L Q H T H  
1171 CTCTTCATTGCCGTATTACGATTCTAGTCAGTGGGATTGGCTGAGAGGGAATTTGGTTACAGTGGATAGAGATTACGGGAAGATTTTGAA  
273 S S L P Y Y D S S Q W D W L R G N L V T V D R D Y G K I L N  
1261 TAAATGTTACATAATATAACGGATACACATGTGATTTCATCACTTGTCCCTTCAATGCCACATTACAATGCAGCGGAGGGCGACGAGGGC  
303 K M L H N I T D T H V I H H L F P S M P H Y N A A E A T R A  
1351 GGTGAAGGAAGTGTGGGAGAGTACTATCAGTTTGTGAGACGCCATCTTGAAGGCTGCATGGAGGGAGTTTAGAGAATGTGTTTATGT  
333 V K E V L G E Y Y Q F D E T P I L K A A W R E F R E C V Y V  
1441 AGAGGAAGATGATCATGAGGAGGGGACTCAGAAGCTTTTAGAAGTAAAGGGTATTTTGGTTTCGGAACAAGCTTTGA  
363 E E D D H E E G D S E A F R S K G V F W F R N K L \*

>CsFAD3

1 AGAGATGGGTGAGTGGCCCTAGTCTTTTCGTAAGCAAAGAGACCAATTAGCATGGCCCTTTTTATAATCTCCATCTTCCCCATCTTTCAT  
91 TTGCCCTTTTCTCTCTCCATTTTCTCTCAACCACAACAGCTGATACAACAAAAAGGCCATTTCCCATTTCCCAATTTCTCTCTCG  
181 AAAGGGAAATATGGCCATTCTCTGCTGGCCAACGCTAACGCCACTGCCGCCGCTCCGGCCCTTTTCGACCCCTCCGCCCCCTCTCTTT  
1 M A I P L L A N A N A T A A A P A P F D P S A P P P F  
271 CCGTATATCCGAGATCCGTGCGCCATTCTCCCCATTGCTGGGTCAAGAGCCCTTGGCGCTCTCTTCTTTACGTTCTTCGAGACTTAGC  
28 R I S E I R A A I P P H C W V K S P W R S L L Y V L R D L A  
361 CATCGTCTCCGCATTGGTCGCGCCGCGCTCTTCTCGACTCCTGGCTCGTTGGCCATCTATTGGCTCGCTCAGGGCACCATGTTTGG  
58 I V S A L V A A A L F F D S W L V W P I Y W L A Q G T M F W  
451 GGCCATTTTCGTCCTGGTCATGACTGgttcgaaatctcatcttctctgttttttttttttttttttttttacactctgttctctttttt  
88 A I F V L G H D C  
541 tttctgtttacgatctctctgttttttttttttttttttttttttttttttttttttttttttttttttttttttttttttttttttttttt  
97 G H G S F S N S S A L N S F M G L L  
631 CTTTCATCTCTTTCATTTTGGTTCCTTATCATGGATGgttaccatcttctccctccttcccgaatcaaaatccccagatcgatcttctcttatt  
115 L H S F I L V P Y H G W  
721 tttctgttcataatttttgtttttttttttggaaatctgaaatctgaaacatcattggatttttctgaaacagGAGAATAAGCCACAGAACTC  
127 R I S H R T  
811 ATCATCAAAACCATGGAAATGTGGAGAAAGACGAATCCTGGGTTCCAgtagcttctcagatctctctgttttttttttttttttttttt  
133 H H Q N H G N V E K D E S W V P  
901 aaatctctctctctctctgttttagcttttaccattcatttcaatgactgttattttgtatcagTTGACAAAGAAGACTTACAAACAAC TAGA  
149 L T K K T Y K Q L E  
991 GAAAAGAACAAGAATCCTCAGATTCACTTTACCTTTCCCCATTCTCGCATACCCATTTTACCTCGtaattatctatctctcatttcggtt  
159 K R T R I L R F T L P F P I L A Y P F Y L  
1081 tttctgtttttttttttctcgattgtttcgaacagtaattgtatattggtaaatattttgcagATGTGGAGAAGCCCAGGGAAGAAGGA  
180 M W R S P G K E G  
1171 TCTCATTTCAATCCATACAGTGATTTATTTGCTCCAGGTGAAAAGAAGAGACATTGTGATTTCAACCTCATGTTGGACATTAATGGCGGCT  
189 S H F N P Y S D L F A P G E R R D I V I S T S C W T L M A A  
1261 CTTTTAGTTTATTTATCCTTCGTTTTTGGTCCATTCCAAATCTTCAAACCTCTACGGCGTTCTTACTGGtaattactttttctataaaa  
219 L L V Y L S F V F G P F Q I F K L Y G V P Y W  
1351 aaaaaataattgtgtagccgaaatgaaagaccttctacttctcctcattaaaaatgggtccatttctcaattcttttaaggaatgaat  
1441 taatgagatctaataagcgtaacatctttgcattttcaacataaaagaatttcttttctattgttctctcacatggcacaactca  
1531 tcaatatttaattataaaaaatgtttccaactttttaaatttccccttcatgggtttttgtttttggatctgaatgcaaatgggcttttt  
1621 tttttctttttcttttttttttttttttgaagATATTGTGCATGTGGCTGGAGCTTGTGACTTATTGACCCACCATGGGTATGACAGAGC  
242 I F V M W L D V V T Y L H H G Y E Q K  
1711 TGCCATGGTACAGAGGAGGgtaagaaagaaagaaaaaagaaatagaatttcccttcccacttattttctgggaaacgaaactttt  
262 L P W Y R G E  
1801 aaaaaccagtggtgatttctttgattttttttaataatttttctaatttctgatggacagGAATGGACTTACCTACGTGGTGGAC  
269 E W T Y L R G G  
1891 TGACAACCGTTGATCGAGATTATGGATTGTTCAATAACATCCATCATGATATTGGAACCTCATGTCATCCACCATTTATTTCTCAAATCC  
277 L T T V D R D Y G L F N N I H H D I G T H V I H H L F P Q I  
1981 CTCCTACTCATCTTGTGAAGCGgtatgtcctttttacccttttatattaccactacacaactgagatttcatctccatctttcaaatca  
307 P H Y H L V E A  
2071 ttattaatgtttaaacatctataaataacaacgagaagtctgtagttcgttagttaaagaagaatgttttaaattgttctaacaatgttt  
2161 aaacaatgcttaacaacttcaacttttcttttcaaaagaagtaataataggttttttaaaagcaccaggacaaccaaaccattcac  
2251 tctaaaaaagtgtgaaattatgaacaacacttgaaaggaacaattatttttaaaatctatcttaataggaatgcttctgttctattta  
2341 gcgtttgatattgacaacgaaataacattttgctttagatgtggttaggtggttgatgatagataccgatgtgattgtctttgtttcttt  
2431 acatttcataatgtttttcttaagtctaaatttccaattaatttctaaccgtataaattaggtcaataagcatcaatttattttacccttt  
2521 taaggcagagacctttttgaacaagttttagaattctccttaataaaaaagtaaattaggttagtgggttaattgtttttgtttttt  
2611 gttttccttttaaaagaatagctaaaaactacaaggaaaacaagatagattgtaagagaagagaagagatttagaaagtcaaacataata  
2701 attaatgtgattgcaatgaattgttttgccagACAAAGGCAGCAAAGGGAGTATTGGGGAAGTATTATAGAGAGCCGAAGAAATCAGG  
315 T K A A K G V L G K Y Y R E P K K S G  
2791 GCCAATCCAACCTCATTTGGTGAAGAATTGGTGAATAGCCTTAAACAAGACCCTATGTGAGTGACCAGGGCAATATTGCTTTTACCA  
334 P I P T H L V K N L V N S L K Q D H Y V S D Q G N I V F Y Q  
2881 GACAGATCCTTATCTTTACCCTACTAAAATTTAGAAAAGAAAAAAGAAATTTGATCATTGGAAAAAGAGAGAAAAAAGAGAAAA  
364 T D P Y L Y H Y \*  
2971 AAAATCGATTCTGTTTAGTTGAGTTTCTCATCCCTTTCTTTTAGAATTGTTCTTTCTTGTGCTTTAGTTTGCACTTTGATATTATACA  
3061 TTTCCCAACTACCCCTCTCCCCCCCCTAAGAGAACAAAAAAGAGAACATTTTCTTTTGGATCCCCTCTCCAAACAAAAACA  
3151 AATAAATTTAATTCATTCCTCTATTACATCTTTATTTTGTATTGTTTTTCTATTATTACTTTTGTTTTCTAGTTGATGGGG  
3241 TTTACATCATTTTAGTTTCTCTTCCATAAGCAATCTCTAAATAGAGAATTAATAATTAAG



>CsFAD5.1

1 AAAACAAACACAAACCACAAC TCTGTTTCAACACTAAATCACCTCATAAATTCATTACAAAACCGACAATTTCCCCCTTCCATTATAA  
91 ATCCCCACAGCACAAATCACTTCAATTCACAGTGCCTGCTTTTTTCTTTCCCCCGATGGCTCTTCTCAATTCTAAATTCACCCGCT  
1 M A L L N S K F H R  
181 TCCCATCTCTCCGCCCTTCAATCCACCGTTCACCCCTCCCCACCCTTAATTTTCCCTCCATTCCCCATGACCAATTACCCTTTCATTTTG  
11 F P S L R P S I H R S P L P T L N F P S I P H D Q L P F H F  
271 TGGGTCGTCCTAATTCATTCCTGAGGTTGAATTCCTCAATTCATATCCAAAACAGAGCAATTTCTCGCCGACAGAAGCATTGAGC  
41 V G R P N F N S L R L N S P I H I Q N R A I S S P T E A F E  
361 CAGAGTCGTTGCCGCCGCCACCGCGTCGGCGGTGGATGGGAGGAGGATTTGTGTGTCGGACGTAGTGGTGAAGCGCGGAGGGAAGTGT  
71 P E S L P P P P A S A V D G R R I L L S D V V V K R R R E V  
451 TTTGGGGAAGGAAATGGAATTCGTTAGATATCGGAACCGCTGGAGTGGTGGTGGCGACGCATTACTTACACTTTTTGCTCCTTTTCAAT  
101 F W G R K W N S L D I G T A G V V V A T H L L T L F A P F Q  
541 TCAATTTGGGCTGCATTTGGGTGGCGATTTCTTTATATATAATCACTGGTCTATTCGGTATTACCCATCATTTCATCGGAATCTCTCTC  
131 F N W A A F W V A I S L Y I I T G L F G I T L S F H R N L S  
631 ATCGGAGCTTTAAACTTCCTAAATGGCTCGAATATCTCTTCGCATATTGTTGGAGTTCAAGCCCTTCAGgttcttaaagaagaaagaaaa  
161 H R S F K L P K W L E Y L F A Y C G V Q A L Q  
721 gaatcccctgtttttcccatgttgttttaggctttgtttaatgtatgctctgtttgtttcttacactgattagggtattttcaacgtcggt  
811 gcagGAAATCCGATCGATTGGGTTAGCACGCATAGATATCACCATCAATTTTGGCATTCGAAAGAGACCCGCATAGTCCAATTGAAGG  
184 G N P I D W V S T H R Y H H Q F C D S E R D P H S P I E G  
901 CTTTTGGTTTGTAGTCATATGAGTTGGTTGTTGATACCAATCTGTGGTTGAGAGGgtgagaattcaattcaatggcttgaattttacca  
213 F W F S H M S W L F D T N S V V E R  
991 aaaaagttaatgttttaattctaatttggatattgttttttgggttagTGTGGAGAGCCAAACAATGTTGGGGATTGGAAAAGCAACC  
231 C G E P N N V G D L E K Q P  
1081 ATTTTACAAGTTCAATTCAAACTACTTATCTTCTTCATCCAATTCCTCTTGGTGTCTTACTCTATTCAATGGGTGGATTTCCTTTCATTGT  
245 F Y K F I Q T T Y L L H P I A L G A L L Y S M G G F P F I V  
1171 TTGGGGAATGgtaagtttgattacttatgtcccttttgatgttattgattttgggtaattccacctttctaaatttatgtgtttcct  
275 W G M  
1261 aaaggattttaggccaagtagtcacaatataggagtaagtaataatacaattgatattgacacttccaatgaaagagacaattaatataag  
1351 ctaagtttaaacatttcttaattaattcaattgtctttttcaatgagaaaaagaaaagaaagagagttgacttgtttttgaaagtggg  
1441 ctatggattgggcttaccatattgggcttttggtaatctccatgttccattgaaagattagtagagcatgagacctaaaaaaatattag  
1531 cagggcagatatagaaacgtaacgagacctgtagtattatcagatatgttatatagcaactttagactcgtaataagactatacatgt  
1621 tggcagtatatataggttaaattgtgattaaccaattatagaacttgtgtgtgattcttaattacagGGTGTGAGAATAGTGTGGGTGT  
278 G V R I V W V  
1711 ACCATATCACTTGGCTGGTGAATTCAGCTTGGCATGTTTGGGGAAGTCAAGCTTGGAAAAACAGGAGATTTATCTAGGAACAACGgtaac  
285 Y H I T W L V N S A C H V W G S Q A W K T G D L S R N N W  
1801 ttttaacttcccatactccccttttatatgacaatgataagcattgattaatattgtttatggcgaagGTGGGTGGCATTGCTTGCATTT  
314 W V A L L A F  
1891 GGAGAGGGATGGCACAACAACCACCATGCATTTCGAGTTCTCAGCCGACATGGCCTAGAGTGGTGGCAGCTCGACATGACATGGTACGTT  
321 G E G W H N N H H A F E F S A R H G L E W W Q L D M T W Y V  
1981 GTTCGGCTTCTCAAGCTATTGGTTTGGCCACAGATGTGAAGATACCAACACAACCTTCAGAAAAGAAAAATGGCAATCATCAACACCACA  
351 V R L L Q A I G L A T D V K I P T Q L Q K E K L A I I N T T  
2071 TGATATAAAGATATTATACTAAAACCTTAATTTTTTGTAAAGCAATCTTCAGTACCAAAAACGTATGTCTTCTCGTTTCGAGATTCAA  
381 \*  
2161 ATGGGTTCTGAAGGCTAAAGTATATAGAAAGAGTAGATAGCATTCAATCGGGAGACATTGGAATGTCTCTGCACTCAACTTTACA  
2251 TAGCATATGATGTATTCACTAATTTAATTAGAGAGTTTTTCTCCCCATTTTTATGATTTTTGTTGCAATACAGTTCGGTTTCGTTTT  
2341 GAACAACGAAAACCTGTAAGTTATACGTTTTAAAAATGGATTGGAAAAGAAATTACAACATGATTTTA



>CsFAD5.2

1 ATGGATACAATGGTGAAGAAGGCTGATCTAATCACATTTGGGCAGAGAAAATGGACAAACAGAGACAAATATATGGCAGCTTTTTTTATT  
1 M D T M V K K A D L I T F G Q R K W T N R D K Y M A A F F I  
91 TTCCTGCACTTCATTTGTATTCTTGCCACCTTCCATTTCAATTGGAATGCATTTTGGGTTGCGTTTGTCTTATACATTATTACAGGTTGT  
31 F L H F I C I L A P F H F N W N A F W V A F A L Y I I T G C  
181 TTTGGAATCACTATTTTCGTATCATAGAAATCTTTTCGCATAGAAGTTTCAGACTTCCCAAATGGCTCGAATACTTTTTTGCATATTGTGGA  
61 F G I T I S Y H R N L S H R S F R L P K W L E Y F F A Y C G  
271 GCCCTTGCTTTTCAGgtttgacatttttaaaactttctctttttttattttaaaacttaaaaaattttactagaaaagggttcttatcat  
91 A L A F Q  
361 ttgacattaagaaaaatgaaaaatggtgagacacatttctatcgtcctactttcctaagtagttttgatcttatttgtttttctatttt  
451 aacttttagGGTGATCCAATCGATTGGGTGAGTACACACAGATGTCAATTTGTGATACGGAAAATGACCCGCATAGTCTTATTC  
96 G D P I D W V S T H R C H H Q F V D T E N D P H S P I  
541 AAGGATTTTGGTTTAGTTATTTCAATTTGGATTTCGAATGCTTTGACCCAGAAGAgtttgtccacagatatttcattgatcataaag  
123 Q G F W F S Y F I W I L D S N A L T R R  
631 atacagaaaaaccatcttcacagtggttttaaaagTATGGAAGACCAAAATAATGTTGGTGACTTGGAAAAACAATTCTTCTATAGGTTTC  
143 Y G R P N N V G D L E K Q F F Y R F  
721 TTCGAAAACCTTATTTTCTTCACTTGCCTCTTGAATCCTTCTTTATGTCAGTCGGAGAACACCTTTTCTTATATGGGAGCGGtaa  
161 L R K T Y F L H Q L A L A I L L Y A V G G T P F L I W G A  
811 aataaaattactttattattatttttttaaaaaaattaaccaaataataaataaataatcattctttatcgatgatga  
901 gtaatgatatacatagatagactacaatcatctatcattgataatagacactgatagacatctatcaatataatcatttatactatatt  
991 tatataattaataacacacagttttgtcgtttaaaatacattataaaatttatataatgtaacatttttacgttgactataaat  
1081 gaagtggacatgatactttatattattattaataaatctctttgttttgcagTTGTGAGGACCATAGGAACCATACATGTGACGTTTAT  
190 F V R T I G T I H V T F M  
1171 GGTGAATTCATATGTCATACATTTGGAATCAACCATGGAATACGAGATTGTCGAGAAATACTTGgtataagtgcttttgtatata  
203 V N S I C H T F G N Q P W N T G D L S R N T W  
1261 ttttcttttcatthaatctcggtgtcaaatagttgtgtcgacctttattttagttagcttggtataatcttttaaatatggtaaattt  
1351 acatgtcaacaaaataagagaagcattttatcaaaagtgtttcttaaaagaagtataaatataatcaatttagaaaaatgaacgcca  
1441 acaaaaatgctattagttaaagtgatataaattagttcaatacaaatggtgcctaaaaaattcattagtcacacaaacacaaaaaat  
1531 gcccgtctatgatctataatcaatgatttaacttttaaaaaaattcaatcaaattagcatatattagaattgtaaattggtatc  
1621 ctaactcttttagaatttggaatggttcataatgtctaatgtagttaaaaaaagaactgaaactagcatatattaactagttatgt  
1711 catgaacgattcataaattaatcaaaagttagtaacccaataaaagtttaacggtcgaagaaaactacctcaaaagtttaagagtggga  
1801 ggagagcatacaaatatgagagttccgtaactaaactgcaaaagttagtagtgctggtaaaagctatccctcgatgtgggttgtt  
1891 gttcgtctagttggttacggttcaagtaggttttaggcaatataatgggtgcaaaaatgagagaaacttttgttatttttatcatctc  
1981 ttcttaaatgggatctgaaatttcaattatgtaataaactaaacctaaacattttattattcttcaataacatattctatagaaactct  
2071 atggtttaccttttattgatcttccatctccggtttcttttctttctggttttttttaagtaggtgagcttctcttgattccaac  
2161 tccctttccctctccctctttaaagaatgaacggtcaaggtgggtattgtgttgactttggagaaatattgacataaactattccacca  
2251 aatttgctttcaagaaaataatttcacgacacaaaacattacactcatattagactagacaacaattagcaaatatataatataatag  
2341 tgaaatgaaatgaacgattattgaaatgttctttgtaaaagtaaa caaagctaattccacattatagctaagcctttgtatgttgaaa  
2431 ttaattaataaaaatatttatggttttggtttttttagTGGATGTGTTTGAATTCATTCGGAGAAGGTTGGCATAATAACCATCATGCTTT  
226 W M C L I S F G E G W H N N H H A F  
2521 TGAGTATTCAGCCAGACAAGGGCTTGAATGGTGGCAGATCGATATTTCTTGGTACATTATTTGGTTTCTT CAGGTCATTGGATTAGCAAC  
244 E Y S A R Q G L E W W Q I D I S W Y I I W F L Q V I G L A T  
2611 TGAGGTTAAAGTACCATCTCAATCTCACAAAGCAAGACTACAAGCTTTGGACCAACCAAGAAAAGGGCTTTGA  
274 E V K V P S Q S H K Q R L Q A L D Q T K R K G L \*

>CsFAD5.3

1 ATGGATACAATGGTGAAGGCTGATCAAATCCCATTTGGGGAGAGAAAATGGACAAACAGAGACAAATATATGGCAGCTCTTTTTGTTATT  
1 M D T M V K A D Q I P F G E R K W T N R D K Y M A A L F V I  
91 ATGCACTTCATTTGTATTCTTGCACCCTTCCATTTCAATTGGAATGCATTTTGGGTCGCTACTCTGTATACTTCTTCAGTTTTTTTGGGA  
31 M H F I C I L A P F H F N W N A F W V A T L L Y F F S F F G  
181 ATCAATATTTGATCATAGAAAATCTTTCACATAGAAGTTTCAGACTCTCCAAATGGCTCGAATACTTTTTGCATATGTGGAGCTCTC  
61 I N I S Y H R N L S H R S F R L S K W L E Y F F A Y C G A L  
271 GCTTTTCAGgtttgatattcctaataactttcttctttcttcttattttgacattaaaaaattattgagagacgttctaagtatctactt  
91 A F Q  
361 ttgtaagtagtttcaatgttatattctaaaagaaactaaaacatattatacttactgttttttttttttaaattttagGGTATCCAATC  
94 G D P I  
451 GATTGGGTGAGTACACATCGATGTCAATTTGCTGATACAAAAATGATCCACATAGTCTTATCAAGGATTTTGGTTTAGTTAT  
98 D W V S T H R C H H Q F A D T K N D P H S P I Q G F W F S Y  
541 TTCACTTGCTTTTGGATTCCAATGCTTTGACTAAAAGAGtttgtccacagtattttattgatcataaagatacagataaaacatcttc  
128 F T W L L D S N A L T K R  
631 acattggttttaaagTATGGAAGACCAAAATATGTTGGCGACTTGGAGAAACAGTCCTTCTATAGGTTTCTTCGCAAAACTTATTTTCTT  
141 Y G R P N N V G D L E K Q S F Y R F L R K T Y F L  
721 CATCAACTTGCTCTTGCAATCCTTCTTATGCGGTTGGAGGAACACCTTTTCTTGATGGGGAATGgtaaaataaaattacttattttat  
166 H Q L A L A I L L Y A V G G T P F L V W G M  
811 tattaacaaaattaatcaaaatatttatagatatataataaaataactattgttatcgacaatgaaatagttatatacacatataaaactac  
901 aattatcatctaccactaataatagacgacagcgatagacatcaatcaatgttactcatttataaacaatgacataattttattatattt  
991 ctatatatttacaacgttattatcgcttgaacaagatatttttatattgaaatataatttttattgaaactataaaatgaagcaagcat  
1081 atgatactttatattattataaataagattcattgttttgagTTGTGAGGACCATAGCATTCTACATGTGACCTTTATGTTGAATTC  
188 F V R T I A F L H V T F M L N S  
1171 AATATGTCATACATTTGGAAATCAACCATGGAACACTGGAGATTTGTCTAAAAATACTTGgtataagtgttttgtatatatatattttt  
204 I C H T F G N Q P W N T G D L S K N T W  
1261 tcattttatcttcatcttcataatagttgtgacctttatttttagttagctattaatattctttaaaatcggtaaaatgagtggttaaat  
1351 atgccaaccaaattaagaaaaacatttttaaaagtagtttcttaaaacaaagtataaatataagtcatttataaaataaacggctactaat  
1441 catattagtttaacgtgtgaaaaattcattagtcacaataatacaataaatgtaggctttgataaatcaatgattaatttttaaaaa  
1531 aattatcaatgattaatcttttaaaaaaattatcaatgatacttccaatgtcataactgtagttagtggtagaaaaattgattatccaac  
1621 tcttttaaaattacaaataatctttcatatctcttaattgtagtttaaaaggaaaaagaatcagcatatattaactagtttatgtcct  
1711 gaatggttcatagttacgtaaccataaacagttcacacttcgaaaaagccactaaaaggtttaagggttgggaggagacataaaat  
1801 atgagagttcttgactaacttgcaatagtaaaggatcttccctcataggtaggctgttgcttcgtaaaatattcaggtactgtactg  
1891 aggcgaaaaatgagagaaacagatattttggttatttttatctttttctttctttaaagttatgaaataaacttggatctgtaattt  
1981 caattatataaactaaactaaacattttattattttatgattcctaattccatcttccctaatcattcttttttcttttttaataa  
2071 agaagagcttttctctatttcaattccttctccgacgaaatgcacgttcgaagtggttatgtgttaactttagagagcaatgacataa  
2161 atgattcccacaaatttgctttcaagataataatttccaacaacgaagctttacatccatattagaccagatgacatatatagcatat  
2251 atatcattagtgaaattggaatagacaatcgttgaaatggtgtgttctaaagtaaaacaaagcctaactccacattatagctaaagccttct  
2341 atggtgcaaaattaattaacacacaatattttttgttttttagGTGGATGTGTTTGCTTACACTTGGAGAAAGTTGGCATAATAAC  
224 W M C L L T L G E S W H N N  
2431 CATCATGCATTCGAGTATTCAGCCAGACAAGGACTTGAATGGTGGCAGATCGACATTTGTTGGTACATTATTTGGTTTCTTCAAGTCATT  
238 H H A F E Y S A R Q G L E W W Q I D I C W Y I I W F L Q V I  
2521 GGATTAGCAACTGAGGTTAAAGTACCCTCTCAATCTCACAAGCAAAGACTACAAGCTTTGGACCAAAACAAAAGAAAGAACTTTGA  
268 G L A T E V K V P S Q S H K Q R L Q A L D Q T K R K E L \*

>CsFAD5.4

1 TTCCTTTTCTTTCCAAAACAAACACAACCAACCACTCTGTTTCAACACTAAATCACCTCATAAATTCATTACAAAACCGACAATTTTCCC  
91 CCTTCCATTTATAAATCCCCACAGCACAACTCAATTCATTCTTCACAGGATTTGTTGTCGGAAAAAGGABFATGAAGCGGCGGAGGGAA  
1 M K R R R E  
181 GTGTTTGGGGAAGGAAATGGAATTCGTTAGATATCGGAACGGCTGGAGTGGTGGTGGCGACGCATTACTTACACTTTTTGCTCCTTTT  
7 V F W G R K W N S L D I G T A G V V V A T H L L T L F A P F  
271 CAATTC AATGGGCTGCATTTTTGGGTGGCGATTTCTTTATATATAATCACTGGTCTATTCGGTATTACCCTATCATTTCATCGGAATCTC  
37 Q F N W A A F W V A I S L Y I I T G L F G I T L S F H R N L  
361 TCTCATCGGAGCTTTAAACTTCCTAAATGGCTCGAATATCTCTTCGCATATTGTGGAGTTCAAGCCCTTCAGgttcttaaagaagaaga  
67 S H R S F K L P K W L E Y L F A Y C G V Q A L Q  
451 aaaagaatcccctgtttttcccatgttgtttaggctttgtttaatgtatgctctgtttgtttcttacactgattaggttattttcaacgt  
541 cgttgcagGAAATCCGATCGATTGGGTTAGCACGCATAGATATCACCATCAATTTTGGCGATTCGAAAGAGACCCGCATAGTCCAATTG  
91 G N P I D W V S T H R Y H H Q F C D S E R D P H S P I  
631 AAGGCTTTTGGTTTAGTCATATGAGTTGGTTGTTTGTATACCAATCTGTGGTTGAGAGGgtgagaattcaattcaatggcttgaatthta  
118 E G F W F S H M S W L F D T N S V V E R  
721 cccaaaaaagttaatgttttaattctaatttgatattgtttttgggttagTGTGGAGAGCCAAACAATGTTGGGGATTGGGAAAAGC  
138 C G E P N N V G D L E K  
811 AACCATTTTACAAGTTCATTCAAACACTACTTATCTTCTTCATCCAATTGCTCTTGGTGCCTTACTCTATTC AATGGGTGGATTTCCTTTCA  
150 Q P F Y K F I Q T T Y L L H P I A L G A L L Y S M G G F P F  
901 TTGTTTGGGGAATGgtaagtttgattactttagtcccttttgatgttattgattttgggttaattccacctttcttaatttatgtgtt  
180 I V W G M  
991 tcttaaaggatttttaggccaagtagtcacaatataggagtaagtaaatatacaattgatttgacacttcgaatgaaagagacaattaata  
1081 taagctaagtttaaacattcttaattaattcaattgctttttcaatgagaaaaaagaaagaagaagagtgactgtttttgaaag  
1171 tgggctatggattgggcttaccatagggctttgtgaaactccatggtccattgaaagattagtagagcatgagacctaaaaaaata  
1261 ttagcagggcagatatagaaacagtaacgagacctgtagtattatcagatagttatatagcaaaccttagactcggttaatagactatac  
1351 atgttggcagtatatataggttaaattgtgattaaccaatatagaacttgtgttgatcttaattacagGGTGTGAGAATAGTGTGG  
185 G V R I V W  
1441 GTGTACCATATCACTTGGCTGGTGAATTCAGCTTGCCATGTTTGGGGAAGTCAAGCTTGGA AACAGGAGATTTATCTAGGAACA ACTGg  
191 V Y H I T W L V N S A C H V W G S Q A W K T G D L S R N N W  
1531 taacttttaacttcccatactccccttttatatgacaatgataagcattgattaatgtttattggcgaagTGGGTGGCATTGCTTGC  
221 W V A L L A  
1621 ATTTGGAGAGGGATGGCACAACAACCACCATGCATTCGAGTTCTCAGCCCACATGGCCTAGAGTGGTGGCAGCTCGACATGACATGGTA  
227 F G E G W H N N H H A F E F S A R H G L E W W Q L D M T W Y  
1711 CGTTGTTCCGCTTCTTCAAGCTATTGGTTTGGCCACAGATGTGAAGATACCAACA CAACTTCAGAAAGAAAATTGGCAATCATCAACAC  
257 V V R L L Q A I G L A T D V K I P T Q L Q K E K L A I I N T  
1801 CACATGATATAAAGATATATACTAAAAC TTTAATTTTTTGAAGCAAATCTTCAGTACCAAAA ACTGTATGTCTTTCTCGTTTCGAGAT  
287 T \*  
1891 TCAAAATGGGTTCTGAAGGCTAAAGTATATAGAAAGAGTAGATAGCATTTC AATCGGGAGACATTGGAATTGTTCTCTCTGCACTCAACTT  
1981 TACATAGCATATGATGTATTCACTAATTTAATTAGAGAGTTTTTTTCTCCCC

>CsFAD5.5

1 ATGGCAGCAGAGAAGGAGGTGAAGCCCATGAAGGCCATAAGCCTTTGGTAATGGATGAATCAAAAACAAGAAGAACCAAAGAAAATGGTG  
1 M V  
91 AAGCCTCCACGATCATTTTGGAGGAGAAAACCTGGACGACCTTAGACAAAACGTGTGCTTATATCATTTTATTGTGCATCTGCTTTGTATT  
3 K P P R S F W R R N W T T L D K R V A Y I I L F V H L L C I  
181 TTTGCACCATTTCAGTTCAATTGGTCAGCATTCGAGTCACCGTTGCATTAATAGTTATCACAGGTCTCTTTGGAATGACTATATCCTAC  
33 F A P F Q F N W S A F R V T V A L I V I T G L F G M T I S Y  
271 CATAGAAATCTTGCTCACAAAAGTTCCAGCTCCAAAATGGCTTGAATACTCATTGCTTATTGTGGAGTTCATTGTCTTCAGGtatat  
63 H R N L A H K S F Q L P K W L E Y S F A Y C G V H C L Q  
361 atattctcgttattatttgattttcatgatattatatattaattcactttgtttttgaaagttgtatcgctttatgatctcttttagG  
451 GCGATCCACTCGACTGGGTGAGTACACATCGATGTCATCAATTCGTTGATTCCGAGAAAGACCCACATAGTCCCATTAAATGGATTTT  
91 G D P L D W V S T H R C H H Q F V D S E K D P H S P I N G F  
541 GGATTAGTCACATGATGTGGCTTTTGGATTCTACTCTAACCACAAAgtttgtccaaagtattccagtgatctaaaaagatagaga  
121 W I S H M M W L F D S Y T L T N K  
631 gaaacatgtttgtgatttttacaagCATGGGAAACCAGACAACGTTGGTGATTGGAGAAGCAAAGGTTCTATAGATTTATTCACAAAA  
138 H G K P D N V G D L E K Q R F Y R F I H K  
721 CATATATGCTTCATCATCTTGCTCTTGCAATCATACTCTACAGCATTGGAGGAGTTCCCTTTTATATGGGGAATGgtatcaattatta  
159 T Y M L H H L A L A I I L Y S I G G V P F F I W G M  
811 aattcactctcatgtttgttctgttttcaataactgattataaattattgatgaaaaatagctataataatattgtattttatgttt  
901 ttcagTGTGTGAGAATTGTAGCGGTTTTTTCATTCTACATTTATGGTGAATTCAGTATGTCATATATGGGGAAGCAACCTTGGAGAAGT  
185 C V R I V A V F H S T F M V N S V C H I W G K Q P W R T  
991 GGGATTTGTCAAGAAACAATTGgtaaatTTTTTctgttctctaccatatttcatcatggaagattgaatgatttatctttatagaaga  
213 G D L S R N N W  
1081 ataagataatcactataaagaatacaagtgtttgttgatccattgaaaaaataagtcttgaaaagattcttcatgagtgattcattttg  
1171 caatattgcataaatatttttagttgtttgtcaatataaaaaatttctttgttttaaatattttattaagaattcaagagtgtttctt  
1261 agaaaaatacatgaaaactgaatttagaaggaaaaaaacataaattttaaaaaacaaaatactaaaatcaaaatcattacaaaacaagatc  
1351 ttgtgtatgtcatatatttttgctcctaattatataaataacaaaaccatataatgatttaacttggattttaccataataatataatgtg  
1441 ggttgtttttgtttaaagGTTGGTGGGTTTACTTCAATTTGGGGAAGGATGGCACAATAACCACCATGCCTTTAGTTATTAGCCAGGCT  
221 L V G L T S F G E G W H N N H H A F S Y S A R L  
1531 TGGGCTTGAATGGTGGCAACTTGATGCTGGTTGGTATGTTATCAAGTTCTTACAAGTCATTGGATTGGCCACTAATGTAAAATTACCCTC  
245 G L E W W Q L D A G W Y V I K F L Q V I G L A T N V K L P S  
1621 TCCCACCCACATGCAAAGCCTAGCTATGGATCATAAACCAAAGGACAAACTTTTCTAAATTGATATCTGACATGCATGCAAGGTAGAGGT  
275 P T H M Q S L A M D H K P K D K L F \*  
1711 CTTATATGCTTCTACGAAATGTTTTGGAACTCTGGAGAAGATCAAATGATGTCCTATAATCTTCCATTATTATTTGAAGGATGCTTGATC  
1801 CAAATATATTACATTGTTTCGGTGATGTTATGGTTGGATTGTTAAAGTTGTTGAATTATTAGAACATTTATTTGTTTAAGAAAAAGTATG  
1891 TAATGTGTTTAGTTTTGGTTGCAGTAATAGAATTAGTGTATTATCTACTTTTAAAAATCC

>CsFAD5.6

1 AGTTAATCATAGGGATCAACTAATTAATTTTGTGGTTGATATATTTTATTCAATAAATGATGTGAAAATTTTCAGTTGGAAGAGCTCTAAG  
91 TTACATGCAGTATAAATACGTATGCTAGAGGAAATGGAATAACATTGATATAGCTTAAGCAAGCCCTCGTCAACAATGGAGGGATCAAAAC  
181 TAGAACAAAAGGATATGGCGGTGAAGCCTCTAAGGTCAATTTAGGAAGAAAAAATGGGCTAAGATTAATAGAAGTGTGCTGGTTCTCTCC  
1 M A V K P L R S F R K K K W A K I N R S V A G S L  
271 TCTTTGTGCATCTACTTTGTATTTTGCACCATTTCATTTAATTTGGAGTGCATTTTGGGTTGCATTTGTATTATACGTTATCACAGGTC  
26 L F V H L L C I F A P F H F N W S A F W V A F V L Y V I T G  
361 TATTGGTATTAGTGTTCCTTATCATAGAAATCTAGCACATCGAAGTTTAAATCTCCAAAATGGCTTGAATACTTATTTGCTTATTGTG  
56 L F G I S V S Y H R N L A H R S F N L P K W L E Y L F A Y C  
451 GAGTTCATGCGCTTCAGGtttgctccttaaccatttctgttttagtctttttctctttttgaaataatgtttttctcctaattcta  
86 G V H A L Q  
541 aatttcatactataaattctttcacatattccaaaaatactttgtctttactcgaatgcttttgacttcaaattctaccaacaaaagtaa  
631 gtttttcaaaaactatataatataatatttttacttttcaaatttcaacttattttttaaacaaggaagtggaacaaaacaaataaaact  
721 tattgataaaatagtttatataaaaaaaatattttctcaaaagaaaaagaaaaaaacaaatgtccacaaactagcttaaattacttta  
811 aagtgttttagcatatctattttatagaaaataaatttctctttattttttaaattttgcagGGCGATCCAATFGGTTGGGTGAAGATAC  
92 G D P I G W V K I  
901 ATAGATGTCATCATCGATTGTGATACAGAAAAAGACCCTCACAGCCCTATTCAAGGATTTTGTGTTAGTCACGTTACTTGGCTTTTAG  
101 H R C H H R F V D T E K D P H S P I Q G F L F S H V T W L L  
991 ATTCCTATGTTTTAACTGAAAAgttggacctaaatattttgatgattatgaaaagatagaaaaggaacgtgggtatggtgaacatgaagc  
131 D S Y V L T E K  
1081 AAGGGAGACCAGAAAAATACGTTGGGGACTTGGGAGAAGCAAGCATTCATAGGTTTCTTCGGAAAACATATTTTCTTCATCTGCTTCTTC  
139 Q G R P E N N V G D L E K Q A F Y R F L R K T Y F L H L L L  
1171 TTGCAGTCTACTATGCAATGGGAGGAGTTCCTTTCCTGATATGGGAATGgtaaaataaaagctttctcaatcctttgaactccttag  
169 L A V L L Y A M G G V P F L I W G M  
1261 ttgatggtaaaataacattatcgggttgattcgtgttgaggaaaacaagcattatcataatgaggttgacctctaataatttatcttc  
1351 cggtttagcaagaattgaaataaggaataatgctttcaaccattgatccaaccacataaataatgtcagatctcaatgttatgaaaacca  
1441 atacatcagtaataacagaaaataggtatagataaaagaaaattattataaaacttctaacaatacctaccaacgtaatacaaatat  
1531 cataatctatctataatagattatgatagatcgatcatgataaataaagatcatagactattataacgtctatcatgatatacaaatagac  
1621 acaataataatagtttttatttggtttacccttttgagtaattttttttgtgagattttatgttttaactaaaattttggttattgaaaa  
1711 aattggtttaaaactaagaattgaaaagttagagaaatattagagctttatataaaaacaaatgagaaaaaatctatataattttatttt  
1801 aaaattggttatttttcgagagaaaaattcaaagaaattgattgaggaaattatgaatttgcattcaaatactcaaggtagaaggatatttt  
1891 tgaacttttattaagggtattttttaaacttttgaaatttaaggtaactcgtcaacgacttatatccaaaattaatgtttcgaaaatggt  
1981 cttactactattttgtaattataaattaatttgatataaattgaaacttataaacaatatttacttttatggatttaattttttaaatta  
2071 gtacaatttatattatttttaccctgttattttttcaataatatacataaatttaagattttttttataaaaataagatataatttaaat  
2161 ttaaaaataaaatgaaacaaaaaggacaataacataaaaattgggagtgggaaatttttatttttggttttgaaattgataccaacgtg  
2251 ggtcaatagatacatccaaaaatctactaaaatattaaaaatttagaaaaccacgttttataagaatgtcctaaacttagatattagag  
2341 tatcttaaaatactacaaaataaacgtaacaacgtgtccattccataaaaataaaactatccaaataatgggtgaaggcattgaaatg  
2431 aggagacaaaatgatgtttttactgctggggcctctatttaatgtatgagaaagtagattttagcaaagaggttggttcatgtaaaaa  
2521 agaaaattaggttaagaatagaaaatttccaaactttccatgacttttccaaacacgtataatacataaatttattgctataacttaaaa  
2611 gttgcagagttgagacatttcttaacgtacatataaaagcttatttaagctaaattttgtaatgcacatttcaacagtcattgtttaga  
2701 ttatttgcaggatagaaaaataagagaaattatgtatcaaattatttatttgtggtgtagGGTGAAGAAATCGTTGTGGTTTTACACATA  
187 G V R I V V V L H I  
2791 ACATTTATGGTGAATTCAGTATGTCATATATGGGGAAAACAACCTTGGAAAGACAAATGATTTGTCAACAAACAACCTGgtaattttctttt  
197 T F M V N S V C H I W G K Q L W K T N D L S T N N W  
2881 tctctctccctcgtccaccctttattaagttagaaatgacctataatctcgttagttacatcatttaacactattcttacttatagaattt  
2971 gattaatataatgataataagaaccaaccgatcatgaaaataaacgttaattggaagaaaaaatacattattacaatagtttgaatacaaga  
3061 tccaagcttttgatcaattctatacatgttgatttgataggcttaagatctagatttttcttagtcataatagttttgtatataacc  
3151 tcttgtgtgtgtgttttagGTTGGTGGGTTTACTTGGATTGGGGAAGGTTGGCACAATAATCACCATGCATTTGAATATTACAGTAGAC  
223 L V G L L G F G E G W H N N H H A F E Y S A R  
3241 ATGGACTTGAATGGTGGGAAATGACTTTGGTTGGTATGTTATTATGTTTCTTCAAGCCATTGGAGTGGCCACTCATGTTAAAGTACCCT  
247 H G L E W W E I D F G W Y V I M F L Q A I G V A T H V K V P  
3331 TACAACACCACAAGAAGAGTTGGCAATGGATGAGACAAAATTTATGAAAGCCTTCGGAAGACTAAAGTCATCATTTACATAAAAAATA  
277 L Q H H K K K L A M D E T K F I \*  
3421 TATGTTAAACTCATGAATATCTTCTAACGAAGACACAAAATCATGCAATAATTCTAAAAGCGAATAAATGTTATTAAATTTT

>CsFAD5.7

1 TACTATATTATTATAGTGAGACATAACATGCACTATATATAAAATACATGTTGGAGAGAAAATGGTGAAAATAATCTAAATTAGAGAGAAG  
91 AAAACACTTTGGAAATGGATATGTCAAACAAGAACTAAATGAAAGGGTGAAGCCTATAATGTCACCAACGAAGAGAGAATGGACCAACA  
1 M D M S K Q E L N E R V K P I M S P T K R E W T N  
181 TTGACAAAACCATTGCATGTCTTCTTTCTTCTTCATGCCCTCTGTATTTTCGCCCATTTAACTTTACTTGGAAATGCGTTTTGGGTTG  
26 I D K T I A C L L F F L H A L C I F A P F N F T W N A F W V  
271 CCCTTATCTGTATAGTATTACAGGTCTTTTCGGCATCACTATTCGTATCATAGAAATCTTTCACATAAGAGTTTCCAGCTTCTAAAT  
56 A L I L Y S I T G L F G I T I S Y H R N L S H K S F Q L P K  
361 GGCTTGAGTATTTATTTGCTTACTGTGGAGCTCATGCAC TTCAGgttttatattattc gataatccttatattgtaattat ttttaatagga  
86 W L E Y L F A Y C G A H A L Q  
451 tatgataatccttgacttcatttcttatatatatatatatattatcatattaaattatatcaaagtatatttgagaatgacttaaaac  
541 ctaacttttgattgtattgatgtaatttagggttccatataatcaactcacatatttctctctaaaaataaattatcttttgatttttc  
631 ttcattgtttacgttacttttggtgattttatagtcataatctttttttat ttttcaaattttgaatttggtgatttttagGGTGATCCGA  
101 G D P  
721 TGGATTGGGTAAGTACACATAGATGTCATCACCAATTTGTTGACACAGACAAAGATCCTCATGATCGTAATCAAGGATTTTGGTTAGTC  
104 M D W V S T H R C H H Q F V D T D K D P H D R N Q G F W F S  
811 ATATCAATTGGGCTTTTCGATTCTACCATTGACTAAAAAGGTTTGTGGTAAgtacttcaatgattccaagaacaaaaaagaacttgt  
134 H I N W A F D S Y H L T K K V C G K  
901 tcacattagtaatgaagcatgagagACCAGATAATGTCAAGGACTTGGAGAACAATATTCTATACGTTTATTCATAAAACGTATATTC  
152 P D N V K D L E K Q I F Y T F I H K T Y I  
991 TTCATCCAATTGCTTTGGCAATCTTTCTCTATATGGTTGGAGACTTCCTTTTGTTTTATGGGGAATGgtaaaataacatctcactacta  
173 L H P I A L A I F L Y M V G G L P F V L W G M  
1081 tcaataaatccttattattttttttattatcttcatcaacatggttaatttaattttatagtaaaagggaaaatggaacaaatagtaag  
1171 aaataaatcattgattaattcctaattcaggaacgtgttttgctagtcagaatttcaaagtacttttttcttgacttatatagttggt  
1261 ggcttcaaaagtgactttgtaataagagagaaactaaaaataat ttaatgtcaaatacatagattatataattgaaattatagccttag  
1351 tttatggtaaatctcgtgtatttttaggaaatataat tttgtattgacgtacctaaccttactgtaccttttgatgcagTGTGTGAGGATA  
196 C V R I  
1441 GTAATGTTATATCATGTAATATTTATGGTGAATTCAGTATGCCATAAATGGGGAAGAAAATGGAGTACAACTGATTTATCTAGAAAT  
200 V M L Y H V I F M V N S V C H K W G K K Q W S T T D L S R N  
1531 AATTGgtaaatctttgtgccttcttttcaactttggaagatgattaatgaagcgcccttttggctcatgagcatgatgatggagctta  
230 N W  
1621 agggatcaacttagttgagagatgcatgggttttcttacggattcattttccttgagatcgtgttaaaaaataaaaagtatcattgct  
1711 tgatataaaaacctttaaagattatcaaacagggtttcaacctaaattaagatgtcttaatacatttacttatctattcttttagtatct  
1801 tattaacgggagagatataatgctcaattttttcacctccaagttaaggattgaatgtttattatataatattgattattgggtaattt  
1891 tagGTGGGTGAGTCTTCTTTCTTTGGAGAAGGTTGGCATAACAATCACCATGCATTCGAGTATT CAGCTAAGTATGGACTTGAATGGTG  
232 W V S L L S F G E G W H N N H H A F E Y S A K Y G L E W W  
1981 GCAACTTGACTTTGGTTGGTATGTTATTATGTTCC TAAAGCAATFGGAGTGGCCACAGATGTCAAATTAACCACTCAATGCCACAAGCA  
262 Q L D F G W Y V I M F L K A I G V A T D V K L P T Q C H K Q  
2071 AAGGATGAAACTGTGAGCTCATCAATGGATGAAT TAAAAATGATGCTTAATTCATACTGAAAGATATAAACACGCCATATAGGATTTA  
292 R M K L \*  
2161 CATAATTATTGTTGAATTAGATGTATAATCCAACGATATATAATATTCAATGATATAGGGATATAGGATTTATGAAGAAGAAATGAGATAT

>CsFAD5.8

1 ATGAGTAATTGGGTTGAGCTAGATCAAGGTTCTCTTCTTATGGATACATTAAGAAGAAATCAAAGAAAAATGGGGAAGGTTTCATCAAATG  
1 M G K V H Q M  
91 ACATTTGGGAGGAGAAAAATGGACCAATGGAGACAAATAAAAAGCATCTCTCATTTTATCTTTTCACGTTCTATGTATTTTGCACCTTTT  
8 T F G R R K W T N G D K L K A S L I L S F H V L C I F A P F  
181 CATTTAATTGGAGTGCATTTTGGGTTGCGTTTGTATTATATATCTCACAGGTTCTTTGGAAATAAGTATTTCTTATCATAGAAATCTT  
38 H F N W S A F W V A F V L Y I L T G L F G I S I S Y H R N L  
271 TCCCATAAAAATTTCAAACCTCCAAAATGGCTTGAATATGTATTTGCATATTGTGGAGTTCATGCAATTCAGgtttgaccttttgaacc  
68 S H K S F K L P K W L E Y V F A Y C G V H A I Q  
361 atcctttgtcttgctattttgtttgaaatctatttttatgttaataacattagaactttctatatttttataacgttgagattaga  
451 agtatgtttatctacacagacctcttaaaagagaagaatgagaagaatgggtggggatctatcggtttaaataactatttttgtc  
541 accataattctagttttgtttcctttccgctcttgactttaataaattcattgtcgcaactatataaacttttagcctaattcggt  
631 caattttgtttatctttgtatgtatttttgaaaaatgaaactcctcaaaaggtagaatgatgacttttgaagataaaaattcaac  
721 ccattaacattttcaaaaataaacttaaaaatacaaaaaagactaaagtatatttttttcaactgaaatatacttaagt  
811 tttttttcaaatcttttattccataactgcatctataatctaaaatattgaaataagtttcatatctgtttgtttggttcatttttaa  
901 ttttttttcttttaattgtagGGTGATCCAATCGACTGGGTGAGCACACATAGATATCATCATCAACATACAGATACCGAAAGAGA  
92 G D P I D W V S T H R Y H H Q H T D T E R D  
991 TCCACATAGTCTGTACAGGATTTTGGTTTGTAGTACGTCAATTTGGATCTTTGATACCATTTTAAACCAAAAAAGTCTGTCCAGAgta  
114 P H S P V Q G F W F S Y V I W I F D T I T L T K K V C P D  
1081 tttttattgattataaagataaaaaaagaggtgccttttctgttactaaataggaagTCCAAATAATGTTGCTGATATGGAGGATGA  
143 P N N V A D M E D D  
1171 TCCATTTTATAGATTTATTCATGATACATACTTACTTCATCCAATGTCTCTGGAGTCTTCTCTACATTGTTGGAGGAACACCTTTTTT  
153 P F Y R F I H D T Y L L H P I A L G V L L Y I V G G T P F F  
1261 TATATGGGGAATGgtaaaaaatctctctcaaaacatgcataaatttttttaaaaaaaggggtttcttttactatcaattttaata  
183 I W G M  
1351 tatatatctacatatataaaggtttatgacaattagggatataattgatgatctctattgattctgcagTGTGTGAGGGCAACAGTGTA  
187 C V R A T V Y  
1441 CATGAATGTAGTGTATGATTAATTCATTTGTCATTTATGGGGAAGAAACAATGGAACTAAAGATCCACTAGAAATAATGgta  
194 M N V V F M I N S I C H L W G K K Q W N T K D S T R N N W  
1531 agtgctttatcgtgaattctgtcatttttttctgtcattttttacctcaccatacaatcaaaatagtttcgaattacgattg  
1621 taacgattgagtcctttttatcgtaaaaaatatcattatagtttaagaaaattgcttacacatggttgagttgataaattgattagaa  
1711 catgcttgagtttaaaaaatgattagagataaattttttatttaataaaaaactataaaaaatagtgatagaaatgactgtcagatta  
1801 taaatttaattatgtaattctattatggactttaatgagtagaaaacttttgatttaagagtataatgaaggtgttaataagaatgcaa  
1891 cctagtaattgaaatgtctaagtagtttaaaaactctctcctctattttttatcgaaaaaagggaaaaataacttttaataatatt  
1981 tataaatagaagtcattatcattatcaaccagagacctaaattaataataaaaatagataatctattttttaaaaaataatctattt  
2071 ttttaaaaaatagataattacttactatttgaactgatacatacctttcacaactcatgtaacattagaagaaaaagacactatacacc  
2161 atcgtattattgtaccattatcatttaagaactaggtaaactgataagaggtgtgggtggttattgatgaaatccacagttggttagcaata  
2251 tacaatgaagccgactatctgtatgttaaaaagttgtatataatataatgaaatctatcatgattgtttgattttgtt  
2341 gcatgtcagGTGGATTAGTTGCCTTCATTTGGAGAAAGTTGGCACAATAATCATCATGCGTTTGAATATTCAGCAAGAGCGGGGAT  
223 W I S L P S F G E S W H N N H H A F E Y S A R A G I  
2431 TGAATGGTGGGAAGTTGACATTGGTGGTATGTTATATTGTTCTTCAAGCCATTGGGTTGGCCACTGATGTCAAACAACCTCTCAAGC  
249 E W W E V D I G W Y V I L F L Q A I G L A T D V K Q P S Q A  
2521 TCACATGCAAAGGCTATCTATGGACAACCAATGAAGACTGTCAAGAAATGA  
279 H M Q R L S M D K P N E D C Q E \*

>CsFAD5.9

1 GCCCATTGAACATGCAAACAGTACAGAAACCAAAGGCAATGGGGAAATCCCAAGGTCATTCAAGAGGAGAAAATATACCAAGTTGGACA  
1 M Q T V Q K P K A M G K S P R S F K R R K Y T K L D  
91 AAATCATTTTCTTTTCCCTATTTCATCGTCCATATTGCCTGTATTTTGCACCATTTCATTTTACTTGGCCTGCATTTTGTGTGCGGTTTG  
27 K I I F F S L F I V H I A C I F A P F H F T W P A F C V A F  
181 CATTGTACTTTTACTTGGCTTATGTATTAGCGTTTCGTACCATAGAAATCTTGCACATAAGAGTTTCAAACCTACCAAATCAATGGAAT  
57 A L Y F I T G L C I S V S Y H R N L A H K S F K L P K S M E  
271 ACTTCTCGCTTATTGTGCGGCACATGCTCTTCAGgtttattaacacgtgatcaacttctacttctttttgtttatgaaatggtatata  
87 Y F L A Y C A A H A L Q  
361 tctatTTTTTAAaattatttggttatttatttatttatttattttagGGTGATCCAATCGATTGGGTGAGTACACATAGATGTCATCATCAATTTG  
99 G D P I D W V S T H R C H H Q F  
451 TTGATACAGAAAAGATCCACATAGCCCTATCGAAGGATTTTGGTTTAGCCATATCACTTGGCTTTTGTATTCTTATAATTGACCAAAA  
115 V D T E K D P H S P I E G F W F S H I T W L F D S Y N L T K  
541 AAgtttgtccaaattattttaccgattttcaaaaagttgatagaagcatattcatatggttctccaagCATGGGAGACCCGATAACGTTTC  
145 K H G R P D N V  
631 GTGATTTGGAGAAGCAAACCTTCTATAGGTTTATTCATAAAACATATTTTCTTCATCACATTCTTCTTGCATCTACTCTATCAAGTTG  
153 R D L E K Q T F Y R F I H K T Y F L H H I L L A I L L Y Q V  
721 GAGGACTTCCATTTCTTATATGGGGCACGgtaaagggttcattataaaactaactttatataaaactttcatgtattcctcttgataatta  
183 G G L P F L I W G T  
811 acatatctaataatgtaacattatTTTTTattatattgaaagttgtgtttaaataccaaaatttaagatataatcatgtaatgtctcac  
901 gtccaagatttggagtcgatcagattcgggtatctaaggactttaacattctcttatatttctagtagatgtggccttagtgacaaaccaag  
991 ataaagaaaacgttgggtggacaatgtgaccatggtagaataggttattatctataccaacaaatataatataatataatatttag  
1081 tagctcaattgaaagaatcttatattggatgacttctatagatttttaagaaaagtgaggactgaggacactaaataactcaacatta  
1171 gctttgtagagataggacacaaactatcaataagttcaaaaaagtatatctgatgatctaactagaggatttggaaaggatacgtga  
1261 gagaatgtcaaagaatcatcatagttttaaatacgaagtttagaataatccaagtcataatcgttggacttgagacgttaaatgatagt  
1351 cataattctttctctccatttaatacaagcatttcgattagataatagatagcaattttcattttgggctaacgaaaaaataattctta  
1441 actttaaattatgtagTGTGTAAGGATCGTAGTGCATGCACGTAACATTTATGGTGAACCTGGTATGTATATATGGGGAAAACGTCG  
193 C V R I V V L M H V T F M V N S V C H I W G K R R  
1531 ATGGAATACTAAAGATTTGTCAAGAAACAATTGgtaagtgcttctatattctttattttcattaatcaaatgtgagatattatTTAA  
218 W N T K D L S R N N W  
1621 atagttgattttatccttaactctccatttcaataactaaattggattaggttggaaaggactatTTAagtattaatgagaaactttctt  
1711 tgacactttaagctctttaaataatttttaatacgttctaagttgaaacaatcatgaaatagaaattctacactttgcttttaaatgt  
1801 actattgttttatatacactctaagattgaaaaaaagatcaaatgtggctcctcgaagcacatccaataaaatggaaatgatacataa  
1891 atattaccatggcttcatacagatgggaaaaatggtaaaaatgttttaaatagatcgaaaaacaacgtggtgagaaaaataaaata  
1981 atttctttaaaaaaataaaaaagtaaaaaataaaagtttggttatctacactaacacttctcaaatagagatactcttctatcaatt  
2071 atattttttattattgacttagtgaattgtgattgtaagactttttatggcattatttccaaccgttaccattcaaaaactgttgaaa  
2161 gaattcccaaccatattatagtaattgccaatataatagatgtctccttttagctagcctaggcatatactatataaattagatt  
2251 tactatttattttagtttttcttttattcttttaagTTGGTAGGTTTGCTTGCATTGCGTGAAGGTTGGCACACAACCATCATGC  
229 L V G L L A F G E G W H N N H H A  
2341 TTTTGAATATTCAGCAAGGTTTGGACTTCAATGGTGGCAAATTTGATTTTGGTTGGTATACAATTAGGGTCTTCAAGCCATTGGAGTTGC  
246 F E Y S A R F G L Q W W Q I D F G W Y T I R V L Q A I G V A  
2431 CAAAATGTTAAACTACCTTACAATTCACAAACAAAGGCTTTTATAGACTATTGAGTCTGCAATAAAAAAATCTATTAATGTTGGT  
276 K N V K L P S T I H K Q R L F I D Y \*  
2521 ATTCTCAAGACGATTTGTTTGTATTTTGTGT



>CsFAD5.10

1 GGAAGTAGCCAAGGTGGGAAGGTTCTACCTATTGGCTAATTTCTTGTGCTTGTTCATCTATATGGAGGCAGCAAGAAAAGAGGTTGAA  
91 GATAAACATGATAAGAAGAAGCAATTTTCAATGGTGAATCCTAAACGTGCATTTTCAACAGAAAATGGACAACCTTTAGACCGACGTACT  
1 M V N P K R A F F N R K W T T L D R R T  
181 GCTGCTGGAATTTTGTCTTGCATTTGCTTTCTCTCTTGGCCCCATTTCACTTCAATTTGGGCTGCATTTTGGGTTGCTTTTGCCTATAT  
21 A A G I L F L H L L S L L A P F H F N W A A F W V A F A L Y  
271 TTGATTACAGGTGCCTTAGGGATTACGCTCTCGTATCACAGGAATCTTGCACATAGAAGTTTTAAACTTCCTAAATGGCTTGAGTACTTT  
51 L I T G A L G I T L S Y H R N L A H R S F K L P K W L E Y F  
361 TTTGCATATCTTGGAGTGCAAGGCTTTCAGGtttctgtattattatgggtattactgtgtgtttgttttataattaaagtcattactga  
81 F A Y L G V Q G F Q  
451 caaggggtgatttgattaagatttggtaattaataacacctgttcggtgtatgatgtcttgagcttcgcttctctgtagtcttgttctttg  
541 tatgatctcttaagctcctctccggctcttcttttgtgtactcgccttttgtgatataaataaaggtagggtttgtaagaaatgtgtcc  
631 aacatagttaacataatttgggtgtactgtaacgcactactaatccttcaatactttattctctcttttaaaaaataaaaagttatattgtaa  
721 cattttatctcttcggttaattttgtctatagGGTGATCCAATTTGATTGGGTTAGTAGCATAGATATCATCATCAGTTTGTGATACCGA  
91 G D P I D W V S T H R Y H H Q F V D T D  
811 TAGAGATCCACACAGTCCCATGCAAGGATTTGGTTTAGCCACATGACATGGATGTTTACTCATATGGTTTACTGAAAAGatttatcc  
111 R D P H S P M Q G F W F S H M T W M F D S Y G L T E K  
901 gaaaaatctcgaagatttcaaggaaagagaagcaaacgaacactttctcgcaattggtttgtgggttttctaaagTATGGAAGGCCAAA  
138 Y G R P K  
991 GAATGTTGAGGATTTGCAGAAAACAAGGTTTCTACAGGTTCTCTCGTAAAACATACCTTCTTCAATCCCATAGCTCTTGCAATTTGTTCTTA  
143 N V E D L Q K Q G F Y R F L R K T Y L L H P I A L A I V L Y  
1081 TAAATTTGGAGGACTTCCCTTTGTTGTTGGGGAATGgtaagattaaca caagggaagaaatagaaaaatgcaattctttgtttgccc  
173 K F G G L P F V V W G M  
1171 ttcatattcttaacatgtagtctctccatctccctgtttattgtgggattgaaaagttgaaaagttatctccaagtaataaaataa  
1261 aataaaataattttaaataagcagttaaaaatctataaaataaataaaactttaccttcacaatttaataaaatgcaatagat  
1351 acaataaaacattcgtttatgttgatcctaaagcagatagatatccatttaagtctatcacggtctatcacatataatttaaatttggt  
1441 catttattggtttgaaactagaattttatagttttcttttaatacaaacatataaatttagtacttttttaaaacaaaacaaatca  
1531 aacctactcaaatttcacaaacattaagtggaaatttgaattttatgactttaattatatttaattctatcataaggttatttttaagtat  
1621 acaaaaatgaatcaaaaataattctaaaataataaaaaattctatgaaattttgttatattttaaagggtttttcaaattgaaacaatt  
1711 tattctttttatttactttttttttttttttgttactaaggtattgcatcaattgttggctttgacaatttgacattcagaagga  
1801 gatggtaaaataaaaaataaagagattgattgtgaaattgtgatgggcagGGAGTGAGGCTGATTGTGTTTTACATGCTGCACTCT  
185 G V R L I C V L H A A L  
1891 TCGTGAATTCAGCATGCCACATTTGGGGCTACAGAAAAGTGAACACCAATGACTTATCAAAGAACAATTGgtctctctctcctcctttt  
197 F V N S A C H I W G Y R K W N T N D L S K N N W  
1981 tcttatcatccatccatagttgttttgttaaaattcctaaggttttaggttttaacaattctgatcttattttgtttatactcctttt  
2071 caaaagtaatatctatatctcatttcaaatttttaattatggttttcacatttcttaataataataaagttttaaaaattgctaaactg  
2161 aattataaaaacaaaaatataaaatataatgtttttaaaaaagaatttgaacggttaaaagaaaatcaataacaagtaacaataatagat  
2251 atagaatgtaggggtagaagtagattttatagacttaatttttttaaaataaaaaacaaaagatagatttatatttctaagctaaagggga  
2341 gatccatggcttgtttaagatctctaacgtaagtttgatttatttgagattttacaagtttaaaagatacctgtttgacaaaggtcaagg  
2431 agctattaattctttttgtttaaagtggtgtggtacacaaatatacatgtaaaagttcattctctcttctaataatttttaggatggtttt  
2521 taaattaattaatgttttgtgtatgtgtttgagagacagGATAATAGGATTGATTCTTTTGGGGAAGGTTGGCACAACAACCACCATG  
221 I I G L I S F G E G W H N N H H  
2611 CTTTTGAATACTCAGCTAGACATGGTCTTCAATGGTGGGAATTTGACTTCACGTGGTGGGTTATCTTATTACTTCAAGCTCTTGGATTGG  
237 A F E Y S A R H G L Q W W E F D F T W W V I L L L Q A L G L  
2701 CAACTGATGTCAAATGGCCACTCACTTCATAAGCAAAAGTTGGCCATCCAATATAAAATCACTTCACCATGTGATTCCTCTTAAGTAT  
267 A T D V K L P T Q L H K Q K L A I Q Y K I T S P C D S S \*  
2791 TATTGTGATCTTTTGCATTTATTTAGTTCCTGTTCTTGTCTGTTTAAAAATAAAAAGAAAGAAAAGAAAATAAATATGTACATGGA  
2881 GTCTTATATGACTTCTTAAATCTTTTATGTCATTGAGTATTATGTTTTCAACATTATGGATTATTTCTCTCCATAATATATTATT  
2971 AATGAGAATGATCTTTAGATTATA

>CsFAD5.11

1 GCAGTCTTTGCTTTTAAAAACGTTCCCTATACTACTCTTTATCGATCTTTGTTTTTTTATTTTGCCATTA CTCTCTTACTCCTCAAATGG  
91 AGGCCACAAGGAAAGAGCTGGAAGATAAAAAATAGCGATCAGAAGGCTATGGCGGTTGAAGACAAACCTCGGGTTAGGTCCCGGCGAAGAC  
1 M A V E D K P R V R S R R R  
181 CATTFTTCCGAAGAAAATGGACAACTTTAGACAAACGTTCTGCTGGTGTCTTTCTGTGTATGCATTTTCTCTGTGTTTTCGCACCATTTT  
15 P F F R R K W T T L D K R S A G A F L V M H F L C V F A P F  
271 ATTTACATGGCCAGCCTTCTGGCTTGCCCTTTGTACTCTACGTTATCACGGGCTTGTTCGGTTTGACACTCTCGTACCACCGGCATCTTA  
45 Y F T W P A F W L A F V L Y V I T G L F G L T L S Y H R H L  
361 CACACAAGAGTTTCAAACCTCCCAAATGGCTTGAGTACACGTTTGCTTACATTGGAGTCCATACACTTCAAGtacaccttcacttttttt  
75 T H K S F K L P K W L E Y T F A Y I G V H T L Q  
451 tttcttttttaattgttttcttgacaatgtttaaattataatctatttttctgggtgtgtttatagGGCGATCCGATTGATTGGGTGAGTAC  
99 G D P I D W V S T  
541 GCATAGATATCACCATCAGTTTGTGGATACAAAAAGAGATCCACACACTCCGACACAAGGGTTTTTATTTGGACATATGCTTGGATATT  
108 H R Y H H Q F V D T K R D P H T P T Q G F L F G H I A W I F  
631 TGATTCATATGGTTGACTAAAAAAgttagccctaaacatgttgaagatttccaagcaaaaagatgagaaaaaagattagtagaaat  
138 D S Y G L T K K  
721 gtttgtgggatatttgaagTATGGAAGACCTAACAATGCTGAGGATTTACAAAATCAAGGCTTTTACAGGTTTCTTGAAGAACATACAT  
146 Y G R P N N A E D L Q N Q G F Y R F L R R T Y I  
811 TCTTCATCATTTTGGTCTTGCAATAATCCTCTATGCTCTTGGAGGCTTCTCTTTCTCACTTGGGAATGgtaaacccagttattctagc  
170 L H H F G L A I I L Y A L G G L P F L T W G M  
901 actaattttgttattttttattttaaagtcgagttgatccaaaaaacatcattttcaaagttaatttttaatatataacttctaggtcag  
991 aagatcacgtaagaattacaaatgtgtcaacttaattataaaatcaatctcctaaaaataatttactgtcatattttgttttagaaaa  
1081 caaaagcacaatcaaacactcttaattagatctaaaaattttatacttgggtttgtccccggttacaattttaaactcattactattatc  
1171 atgatcattagaagtaattttaaataatagtgaaatgaactaaaatatttcaaaaataaaataaaattttaaactcattattatgatagacag  
1261 tcataatttgtatctctcatcatcgatagaatgaagatttagtatattttagaagttttctaaatgattttatcatttacaatatt  
1351 atttaagtattattactactactacatgtagctttaaactcaacgtaacaaagttaaatatagtggtcaacctagttaacgtgtgt  
1441 tctatatgtgtcctaacttatttgacatagctagtggtgcgactaattgcacatacatccaaatgttttagaaaataaaaaacctaatat  
1531 acaccgattattttgcaataaatccaagtttttaacctataatttctaaaactaatcactgtcaactgacataaaaatatacgtcagg  
1621 tacgtaattaaatatacatatataatcttttatgcaagctttggaagtgtggtgaaaaacattatttattgttaattttcagtacata  
1711 aacatcatatagttgatgttaacattacaaagaatgtttgaatggaagggttgaattgtgaataaatgcattgaaaatgcagGGTGTA  
193 G V  
1801 AGAACTGTATGCTTTCAACATGTCACTTTTCGCTGTGAACTCTTAGGCCACATGTGGGAAACCAACCATGGAACACTGGAGATCAATCT  
195 R T V C F Q H V T F A V N S L G H M W G N Q P W N T G D Q S  
1891 AGAAAATAATTGgtgacgttcacacgttctctttcatttttacattacagttcttttaagattttctagtcattttttctcggtatattgga  
225 R N N W  
1981 tttgttcttgtaacgttttcggttctagagacgtatataaaatgaacctagatcacacacgatgaaatggatattatagtatattataatct  
2071 aaaaatctataacgagtgtaatttgattgaaagaaaaacaagaaaaaaagtatataaattgatttttatatttccaactatgctttggcta  
2161 aactaggatgacttttgaccatctttaatttttaagactttgccaccagtggactgataagaattgtttggatttttagGGTGTGGC  
229 V L A  
2251 ATTACTCATCTTTGGAGAAGGATGGCACAAACACCACCATGCATTTGAGTATTCAGCTCGACATGGCCTAGAATGGTGGCAGTTGGATGT  
232 L L I F G E G W H N N H H A F E Y S A R H G L E W W Q L D V  
2341 AACTTGGTGGGTTATTTTGTCTTCAAGCCATAGGGTTAGCCACTGATTTGAAGTTACCCTCTCAACATCACATGCACAAGTTGGCCAT  
262 T W W V I L F L Q A I G L A T D L K L P S Q H H M H K L A I  
2431 CCAACCCAAAAGCGATTAATGATACTAAAAACTATTTAAAATGACTTTTAAAGGAATTAATAATTAATTTTAAA  
292 Q P K S D \*

>CsFAD5.12

1 CTGAGTTGAGACATCGGTGCTTTCAAAACCTCCCATACTACTGTTTATCTTTGTTCTTATTTTAAATTTCCATTAAATGTCCTTAGTCCT  
91 CAAATGGAGGCCACAAGAAAAGAGCTGGAAGATAAAAAATAATGATCACAAGGCTATGACGGTAGAAGGCCAAAGCTCGAGTTAGGCCCTCGA  
1 M T V E G K A R V R P R  
181 AGAAGAAGGCCGCTTTTTCGAAGAAAATGGACACTTTTAGACAGACGCTCTTTTGGTGGTGTATGGCTATGCATTTGCTTAGTCTCTTG  
13 R R R P L F R R K W T L L D R R S F G G V M A M H L L S L L  
271 GCACCATTTTATTTACATGGCCAGCCTTCTGGCTTGCTGTTGTACTCTACATTCTCACAGGCTTGTTCGGCGTGACGCTCTCATACCAC  
43 A P F Y F T W P A F W L A V V L Y I L T G L F G V T L S Y H  
361 AGACAACTCTCGCACAAAAGTTTCAAACCTCCCAAATGGCTCGAATACACATTTGCATATATGGGAGTTCATGCTCTTCAAgttagtaaa  
73 R Q L S H K S F K L P K W L E Y T F A Y M G V H A L Q  
451 tattttactagtcaatgttcttgcattttcttttcttttccattcttttgtgattttatattgtgtgtttatagGGCGATCCAATC  
100 G D P I  
541 GATTGGGCGAGCACACATAGAATTATCATCAGTTTGTGATACGGAAAGAGATCCACATAGCCCATCAGTAGAAGGGTTTTCTTTGGGA  
104 D W A S T H R I H H Q F V D T E R D P H S P S V E G F F F G  
631 CATATTGCTTGGATATTTGATTATATGGTTTGACAGAAAAgttaatccaaaatattgttgaaagttttaaggaaagagatgaaaaaga  
134 H I A W I F D S Y G L T E K  
721 aagacatttagcaatatttttgggatatttgaagTATGGAAGACCTAAAAATGTTGAGGATTTACAAAAGCAAGCCTTTTATAGGTTT  
148 Y G R P K N V E D L Q K Q A F Y R F  
811 ATTCGAAGCACATACATTCTTCATCATTGTCGCAATTATCTCTATGTTGTTGAGGCTTCCCTTCTCGTTTGGGGAATGgta  
166 I R S T Y I L H H F G L A I I L Y V V G G L P F L V W G M  
901 agatatctgttcttctaccacactaatattttactttactttttattaggtcgaatttaatttaattaggttttagctagagaaattttat  
991 tttagtttagtagtaacaaaaatataaattatagtttaactatagtaaaacaaactaaaatattataaatacaaaaaatataatata  
1081 cataaagtagtaccaaagtaacttgatggaattcaacccttacgaactttctatttaggtacaaaataatagatagtcacataata  
1171 gtatatattttgttatatttataaataatttcaactgttttatcattttaaataaacttttctaagttaataatagagatattttcgtataga  
1261 gcaacatttagtcgttttgatataaatgtgataatagtttctaaactttgttattttaaataagtttaataatcataataaagtttacac  
1351 tacatgttagctgttattatttttaaatgtaaaatagtttgaataataaattgttataatattttcacacagcatgtagcctattcat  
1441 ttcacctatacaagtttgcaaaaaaaaaaaaaaaaacaaaagttttctaattttgttttgcaaaaaggacgatagcacaaattgattta  
1531 tgtgtgtgtatataatacaactaacatgtaaggatttgaatcttgaagccacattattatggaatttaatatgtataagccacataat  
1621 gtacatgttttaattttctaaaatgaaagcgggttaaaaggttaattataaaatgaagggtaaaaatgagaggttgtaaaaatagcaaaag  
1711 aaaaaaaaaaacgataatataatattacagtgtatatacacttacttttcaaatttgtaaaaataataaattttaaagttatattatcgtct  
1801 gattttgtcaaatttacaataaaaaaaaaaaggtttacgaactgttttttctaaactttttgtcatctaaatacaattctcataataaa  
1891 attgttgaaaaattttcaaaaatattacaagattttatattctatttataaaggtttatagacatgttatttagtgacattgatagaagtt  
1981 tattaattttctgtataaaaatttttagattttactatattttgtaaatattttataatttttatcatattcgaaaaaaaatctcgtcaac  
2071 atgaaaataattataaattgtagtagttttgagaataataattacgtacaacttatttttcaaatagcaaatatacaaaaatttattctc  
2161 acaaaaataattatgtatcatcttagactttttttaaataatcgttgatatttaattattttaaactcaaaatactatatataattttt  
2251 tttttgtaagaagtgaggagtggtataaaaaatggtaattaaaaatacaaaagagtttaagacacattaatttagcaactaattttataa  
2341 gtggatgacagctgtaattagtaacacaatataaattggttttaattatgggtccattttatttactattttctttgttggttaa  
2431 caaaatataataggggaagatggagtggtttgagtcacagggttaattagatataaataacttaatttgctgcaaaatcattagttagatac  
2521 acaataatctatattctctttttgtacaatattgaaagtggtgataaataacattaattattgttcattcatatgtaattacatcaga  
2611 aagaatatttgaaaattgaaagagaggggggtgagaaaaggggttcatgaaatattatattgaataaataatggcattgattttga  
2701 ttattttgtgtgtgcagGGTGAAGAATTGTATGCTTCAACATGTCACCTTCTTCTTAACTCTGCAGGCCACTTGTGGGGAAGCCAAC  
195 G V R I V C F Q H V T F F L N S A G H L W G S Q  
2791 AGTGGAACTGCGGATCAGTCCAGAAATAATTGgtgatgtttaaattgtttatctttcttttcatattttctctttaaagaacttttag  
219 Q W N T G D Q S R N N W  
2881 gaggattacatgcataaataaataattcatgatgttagatcacatccccgattgtatcaaagtatgaccaggaggaatgcttaaataa  
2971 tgaatgactagccattatccatatacactaataactctattttcttcaaattggacttgagatggaatctcatcctatcatataggttt  
3061 tacctatttccatcaattgatatacaaaagtcagttggtgtggctaaagacatgtaacaatttgaataaaggttgatagctataataat  
3151 ctaaataatcaattgatataattttattgaaactagtttcaacttttagGATGGTGGCATTGTTTATGTTGGAGAAGGATGGC  
231 M V A L F M F G E G W  
3241 ACAATAACCATCATGCATTTGAGTATTCAGCTCGACATGGCCTAGAATGGTGGCAGTTTCGACGTAACCTGGTGGATCATTTTGTCTTCTG  
242 H N N H H A F E Y S A R H G L E W W Q F D V T W W I I L F L  
3331 AAGCAATAGGGTTAGCCACTGATGTGAAGTTGCCCTCTCGAAATCACATGCAAAAAGTTGGCCATTCAACCTAAGATCGAGTAAATAATAG  
272 E A I G L A T D V K L P S R N H M Q K L A I Q P K I E \*  
3421 TAAACATGGTTGAGAAATGATTTTTTAAAGGTT

>CsFAD5.13

1 AAATAGTTAAAGATTGTTAAAGATTTTGGGACCATAAACTAATTTTCTAACTTTAAATGTTTGTATATACTTCACAACATAAAATACCAA  
91 CTATCCCCTACATGCATGCACTGAACCTACCCTAGCTATACTATACGAAAGAAAGAAATAAGAGGAAAGAAAAGAAAGAAATAAGAGGAAAG  
181 AAATGGATGAAGTATCCAAAGAAAAGCCAAAGGAGATGGTGTGAAATCTCCTCCAAGGCTCTTAGGAGAAAAAATGGACAAAGTTG  
1 M V M K S P P R L F R R K K W T K F  
271 ATAGAAACGTTGCCTTTTACTTTCTCAGTTTGCATCTACTTTGTATTTTGGCACCCCTTCTATTTTAGTTGGACCTGTTTGTGTGTCGCCT  
19 D R N V A F Y F L S L H L L C I L A P F Y F S W T C L L L A  
361 TAGGCTTATCTTATTTAACAGGTATGGGAATAAGTGTCTCGTATCATCGAAATCTTGCACATCGAAGCTTCAAGCTTCCAAAATGGCTTG  
49 L G L S Y L T G M G I S V S Y H R N L A H R S F K L P K W L  
451 AGTATTCTCTTGCCTTATATTGCAACTCATGCAATCCAGgtttgatattttgaattcctttgattttatatttagtttaagactattttgaa  
79 E Y S L A Y I A T H A I Q  
541 ttctttgattttatatttagtttaaaactatacatgatggataatacaaaatatttaaattttttgtcacacattagtataaaacttataa  
631 atcaataagatggtgaacatgatataatgggagtaggtggtcattattgattttacataggttaaccctacaagtgaggatttatta  
721 gtgttgcccttagctactttggattcattttgcatgcaaaatcatcattatttaggttatgccatattttgtgataattgtatataca  
811 ctacttaaaacacaaaacattattaagaatggtgtagtgaattattgcctacatgtgatttagaagggtaaaactgtgacaaaacc  
901 ctagtgcataattttttatctacccgtggtttgttaaaatctgttaactttttcttcttaatttttagGGTGATCCAATTGATTGGG  
92 G D P I D W  
991 TGAGTACACATAGATGTCACCATCGATTTCGTTGATTTCAGCACGAGATCCACATAGTCTATTATGGATTCTGGTTTAGTCAAATGACTT  
98 V S T H R C H H R F V D S A R D P H S P I Y G F W F S Q M T  
1081 GGTTTTTTGATTGCTATAAAGTTGACGAGAAAAgtttgtccaaactattttaataattatcaaaaggtggagagaaacatcttcatgtttt  
128 W F F D S Y N L T R K  
1171 acatgaaaCATGGATATCCAGACAATGTGACAGATTTGGGAAACAAAAGTTCTATAGGTTTATACATAAAACATATTGGCTTCATCCAC  
139 H G Y P D N V T D L E K Q K F Y R F I H K T Y W L H P  
1261 TTGCCCTTTCACTCTTGTCTATGCCATTGGAGGACTACCTTTTCATCATTGGGGAATGgtataattattcccattcttttttagctttt  
166 L A L S L L L Y A I G G L P F I I W G M  
1351 actcctacaatttgaagttgtgattaaatttatttatgagtcctctaaaaattagtttaccattccttttataaattctatttgtttg  
1441 gatttttgacattttaacttaactttggttaaactagcaaatttaataattttttgaaagaaagactgtatgtttttgtattgacataa  
1531 caaaggtagttgaattttattttgactattttacttaaatgtttactcaaatattattgtttatctttatgaaactgtgacagacaaa  
1621 ataaactattttaaagttctattgtgatagacacatgtaatagtctataattttgatccgtcatacctaaattgtgctatttaatatat  
1711 ttgtagtagttttgtcttttttattattattttatacaattaatcattgattaacattatttattgtttaaactataaaattaat  
1801 tagtcttcaacgttgaaactgttcatgtctaatgaagctaaagctttataaaagatctagaagttatactgtgtatttagttaaatt  
1891 caatcttataatttaagaagttgtgaaatttaggctctttgataataatgaattgttattttttctctctttttgtgtaaactt  
1981 atataactttttttctccccatttttaactatggtttcaaatgtttgcaaaataataatatttttagtcaattccaatcaacaaccaa  
2071 aatttgaagatataatgtatttttttacttttcaaaacttgatcactgtttaataatgattagccataaatataagtagaaaaggt  
2161 agttgaaatgtatttttcaaatgatgtaagttcctttctcataaatagttttaccatctagtttaattattctagatttaagattata  
2251 aaataataattataatttttataatttttctcattgaaatattttactaaactaaggtttttgtgtttataaacttgcgtatataagTGC  
186 C  
2341 GTGAGGTTTCGTATACAGCTTGCATGTGACATCTATGGTCAATTCAGTATGTCATATATGGGAAATCAACCATGGAATACGGTGATTTA  
187 V R F V Y S L H V T S M V N S V C H I W G N Q P W N T G D L  
2431 TCCAAGAATAATTGgtatgacattttttttactttcctttgaaatccctcaaaattcaattttactccctaattttcaaaaatac  
217 S K N N W  
2521 tttcacaaccctaatttagataaaatcatatttgaataatataatgttctcttttcggtgttcttttctctttttatagGATGGTAGCTTT  
222 M V A L  
2611 ATTAACCTTTGGAGAAGGATGGCACAATAACCACCATGCTTTTGGAGTATTTCAGCGAGACATGGTCATGAGTGGTGGCAAATGATTATGG  
226 L T F G E G W H N N H H A F E Y S A R H G H E W W Q I D Y G  
2701 TTGGTATCTTATTAGGTTCCCTTCAGGTCATTGGATTAGCAACCAATGTGAAATACCTTCTGAAAAGCAAAAATTGGCTGCTTTAAACAA  
256 W Y L I R F L Q V I G L A T N V K L P S E K Q K L A A L N K  
2791 ATCAAAACCCATCTTTCTTAAGCTTATGATTGATTGA  
286 S K P I F L K L M I D \*

>CsFAD5.14

1 ATTTGGGGACCATATCTAATTTTTTAACTTTAAATATTTGTACAATTCACGAGTATAAATACAAATGTGCCCTAGACTGAAGTCACAAC  
91 ATACCAAAGAAAGAACAAGGAAAGAAATGGAAGGAGCATCCAAGAAAGACCCAAAGGAGATGGTGATGAGCTCTCCTTCAAGGCTCTTTA  
1 M S S P S R L F  
181 AGAGAAAAAAGTGGACAAAGTTTGATAAAAACGTTGCCTTTTACTTTCTCTTTTACATCTACTTAGTATTTTGGCACCATTATTCTATT  
9 K R K K W T K F D K N V A F Y F L L L H L L S I L A P L F Y  
271 TTAGTTGGGGTGTGTTGTTGCTTTCCTTGGGATTAGCCAATCTAACCGGATGGCAATTAGTGTTCGTATCATAGAAATCTTGCACATC  
39 F S W G C L L L S L G L A N L T G M A I S V S Y H R N L A H  
361 GAAGCTTCAAACCTCCAAAATGGCTCGAGTATTCTCTTGCTTATATTGCAGCTCATGCAATTCAGgtttgataccttgaatcccttatgc  
69 R S F K L P K W L E Y S L A Y I A A H A I Q  
451 tctaactaaaaatggctctaaactacgaataaaacatgaattacacattttgattttataactaaatttgaggttggtactctatgacacat  
541 tatttaattttacttcaccttttttaattaatcaataatttaatatgatattagaataaagtttcacagggttcttttgcatcctaaac  
631 cattgcaatgtcattacctccttaataataattgattctcaccttttggattttgtacacacatttcaatcccacaaaagttaga  
721 gtaaatgattttgaatctaaaaacgaacagtggtgatcattacattatacagtggtgatcattacattatacatgaaagaatgattttt  
811 atacacattacttagacatccaatcataaaaggattgagtagtgtagtaattgcctacgtactataaaaaagattaaatttagagact  
901 aatcctatcatatTTTTtagcgggtgtttgttaacatttgggttggttcttcaattttagGGTGATCCAATTGATTGGGTGAGCACAC  
91 G D P I D W V S T  
991 ACAGATGTCACCATCGATTGTGATTGAGAACGAGATCCACATAGTCCATTTTATGGATTTTGGTTCAGCCAAATGACGTGGTTTTTTG  
100 H R C H H R F V D S E R D P H S P I Y G F W F S Q M T W F F  
1081 ATTCGTATAACTTGACGAGAAAAGtttgtccaaactatTTtaataattatcaaaagggtggagagaacatcttcatgttttacatgaaac  
130 D S Y N L T R K  
1171 ATGGATATCCAGACAAATGTGACAGATTTGGAGAAACAAAAGTCTATAGGTTTATACATAAAACATATTGGCTTCATCCACTGCTCTTT  
138 H G Y P D N V T D L E K Q K F Y R F I H K T Y W L H P L A L  
1261 CACTCTTGCTCTATGCACTTGGAGGACTCCCTTTCATCATTTGGGGAGTGgtaaaatataattattttccctttccatttactctttta  
168 S L L L Y A L G G L P F I I W G V  
1351 attattaaggttataaaactcctatttggttgaaatgttcaaaatTTTctttcaacttttctaaaagaaggaaatTTTaatctttttcatta  
1441 ataaattaagttgtgatttttttaccattgttataatttgattgttcattacatgttttttaggcaatctacacacagacaatTTaagtg  
1531 tttttttaaaaataaatgaaagaaaaataatagtatacatgtaataactttttgtagattttcattatcgtaataaaacctgaaat  
1621 ctaaaagttttgtttttctttttacataaaggtaaaagatttatttgacaattaattattgatttatattatataaaagttaaaattat  
1711 atataagtagtaaacctaaacctgaattctaaaatttataactaatctaatcttcatcttttaaaaaatatttagtaggtttttggact  
1801 atttgtatgtttaaacaagt cactcaaatTTcttttatcgagaagatttatgaatttaaaaaataaaataattttatagtctcattcga  
1891 taatgattttgttttaattttttataatggttttcattttctcaataaacattaaaacctaatTTTcaagtaaaacactagatcgttg  
1981 ataatcagtagtaaaagtattgtggtttgattatgattataattattagattataactagagagatggatgatctttccaccatataattggtt  
2071 aattataatagtttttcatgaaatataatTTTatttatgaagtgtattttattaaactattgacagTGCCTGAGGTTCTGACTGAGCT  
185 C V R F V L S  
2161 TGCATTTACATCTATGATAAATTCAGTATGTCATATTTGGGGAAACCAACCATGGAACACTGGGGATTTATCTAAGAACAATTTGgtaag  
192 L H F T S M I N S V C H I W G N Q P W N T G D L S K N N W  
2251 acatacacttttcttattatctctttttctttttattcttttcttttaccatttgctagtgaataatgggttttatattaattaatta  
2341 atgttgatacatcaatTTTcatatTTtatcatcaatccagttacataaaattgaaatattctatatcaaccctttaccattgtttcga  
2431 aataatTTTgcttttaaaagtaggaagtaaaatTTTaaaccttcaggacaattaCAAagtttaaatagttgttttaccactgtcaaac  
2521 tattatagatttagataaatctttgacttgacaaagtttaaatagttcattgtttcatttttaattagGATTGTGCTATATTACCTTT  
221 I V A I F T F  
2611 GGAGAAAGGATGGCACAATAACCACCATGCTTTTGTGATTTCAGCAGACATGGTCATGAATGGTGGCAAATGATAATGGTTGGTATATT  
228 G E G W H N N H H A F E Y S A R H G H E W W Q I D N G W Y I  
2701 ATCAAGTTCCTCAAGTCATTGGATTAGCCACCAATGTTAAATTACCTTCTGAAAAGCAAAAATGGCTGCTTTAAACAAATCAAACCC  
258 I K F L Q V I G L A T N V K L P S E K Q K M A A L N K S K P  
2791 ACCTTTCTTAGGCCTATGATTGATTGA  
288 T F L R P M I D \*



3601 catgttaactaagattttattaccataagtcacattgacttagcttctaagtttatcctctcccatctacagGATCGAGATTCTCTGCCAT  
354 I E I L C H  
3691 GACATCAATGTGCACATTCCCACCATATTTCTCCAAGAATACCGAGTTACAACCTACGGGCAGCTCATAAGTCTCTTCAAGAAAAGTGG  
360 D I N V H I P H H I S P R I P S Y N L R A A H K S L Q E N W  
3781 GGAAAGgtaaatggggttaaaccaaatgcatatgtacatagttcagatgttcagatcttgcaaaatctaattggttgccttggtttattgcata  
390 G K  
3871 tattttccccattgatgctaataatctagttcttttcttccactttggttacacattctgtagCATCTGAATGAGGCTTCATGGAATTGG  
392 H L N E A S W N W  
3961 CGATTAATGAAGACGATCATGACGATATGCCATGTATACAACAAAGAGGAAAATTATGTCGCATTTGACCGACTCAATAAAGAAGATTCT  
21 R L M K T I M T I C H V Y N K E E N Y V A F D R L N K E D S  
4051 TATCCATTACATTCTCAAGAAAGTCATGCCTGATCTTGCTTGATTTAATCTTTACCTCAACCTTCGGGAACACAGTCCACAGACACTT  
41 Y P I T F L K K V M P D L A \*  
4141 GCTGCTTCTTCTCTGTGCAATGTTTCTCCACAGATTTTGAAGAACGAATGGAAGGAAAGCTTGGTTAGTTGACTGCCATATATTGA  
4231 GTTAAAGAATTTCTCTATTCCATTTCCAGTCTCTCTCCTCAAATAGCAATATATATGTAACCTTTTCTTTAAGGTAGTTGTGATCTA  
4321 AAGAGGAAAACAGACCTTTGGTGTTTTATGTTGCCAACTTCTTAAAAAGGTGGAATGGAATATGGAACATTCTTTATCAAAGACAC  
4411 CTA CTGACAAAGATCAATACAACAACCAACCATTATCATGCAAGCGAA

>CsFAD7

1 GGGGGGGCCCAAGTTGGAGGACAATCAACCAGAAACACAAGTTGGGTTTTTATGGTTGTAAGTGAATGAAGAGATTTCTGGCTGTGTTATC  
91 TCATATCTGCTTCTGATTTCCCTTTTTATTTTAGGGTTTTGTTGTACCATCTTTTCTTTTCTTTATCTTAAGCTGTTTGAGGCTTA  
181 AAAAAGTTGAGGCTACTTGTGTTTTTCTCATCTGGGCTCTAATGGCGAGGTGGGTCTTATCTGAATGTGGTGTAAACCCTCCCTAGGAT  
1 M A R W V L S E C G V K P L P R I  
271 CTATCCTCTGCCATCTAGGAATGGGTTTGCTTCTAAAACTTTTATGGTTTTCTGAGATTAGGCAGCCATTGTTGGCCCTCAAAGCTCATGT  
18 Y P L P S R N G F A S K T F M V S E I R Q P L L A S K A H V  
361 TCTTCGCTCTTCTTTGGGCTTTCAACTAAAGGGAAGAGTTGGGCATTGAATGTGAGTACTCCTGTGGCAGTTGCTTCTGTGATGAGGA  
48 L R S S L G L S T K G K S W A L N V S T P V A V A S V D E D  
451 TAATGAGAGGGAGAGAGTTAATGAGGTTAATGGGTTGAGGATGAGGGTAGTTTCGACCCGGCTGCTCCTCCGCCGTTTCGGTTGGCTGA  
78 N E R E R V N E V N G V E D E G S F D P A A P P P F R L A D  
541 TATTCGTGCTGCCATTCCAAAGCATTGTTGGGTTAGGGATCCTTGGAGATCAATGAGTTATGTTGTGAGGGATGTGGTGGTGGTATTGG  
108 I R A A I P K H C W V R D P W R S M S Y V V R D V V V V F G  
631 CTGGCTGCTGTTGCTGCTTACTTCAACAATGGGTTGTTTGGCCTCTTTACTGGTTTGTCTCAAGGAACAATGTTTGGGCTCTTTTGT  
138 L A A V A A Y F N N W V V W P L Y W F A Q G T M F W A L F V  
721 TCTTGGTCATGATTGgtaatttccactcttttggaaccattgaataatctttacctgctttttgtcttgggaattcccttgctgatttgat  
168 L G H D C  
811 agtgtgttttcttaatggttagtttgattttgtttttgaatgtgcagTGGCCATGGCAGTTTCTCTAATGACCCAAATTTGAATAGTGTT  
173 G H G S F S N D P N L N S V  
901 GTTGGCCATATCCTTCATTCTCAATCCTAGTTCCATATCATGGATGgtagttcttgattatctttctgaaatccccgtttggtcaaatta  
187 V G H I L H S S I L V P Y H G W  
991 ttctttttgtagctttaactttctatgacaacataaactatagtttcatatcatgttgttcttgaacgcagGAGAATTAGCCACAGAAC  
203 R I S H R T  
1081 TCATCACCAGAACCATGGTTCATGTCGAAAATGATGAATCGTGGCATCCTGtaaattccttgacttctttccataaaacaagaatga  
209 H H Q N H G H V E N D E S W H P  
1171 tcactctgttgaaatctaattcaatagcaatatgttcatatctgctttgcagTTGTCTGAGAAAATTTATAGGAGTTTGGATAAAGCAACA  
225 L S E K I Y R S L D K A T  
1261 AGAACACTAAGGTTGCTCTGCCGTTCCCATGCTTGCATATCCTGTCTACTTGgtagtgaactctgtttctcaacatccttcttgt  
238 R T L R F A L P F P M L A Y P V Y L  
1351 gaacttcaatgttatgccaattccttgatggatttcaatgaaaaatggttgatattgcagTGGAGTAGAAGTCTGGAAAAGAGGGCT  
256 W S R S P G K K G  
1441 CTCATTTTGACCCCTAACAGTGATTTGTTGTACCGAGTGAGCGGAATGATATCATTACATCCACTGCTTGTGGACTGCAATGCTTGCTC  
265 S H F D P N S D L F V P S E R N D I I T S T A C W T A M L A  
1531 TGCTTGGATGTCTATCCGTAGTGATGGGTCCCTCCAAATCATCAAACCTCTACGGTATTCTTACATGgtgagtttggtttgatcatga  
295 L L G C L S V V M G P L Q I I K L Y G I P Y M  
1621 attcagcatgaatatttcatgttttaagtccaactactacgctcgattgacttctttttcaaaagtgcactgctctgaatgtattcctt  
1711 atgtagATGTTTGTGCTGCTGGCTGGATGCCGTCACTTACTTGCATCATCATGGTCACGATGATAAACTTCTTGGTATCGTGGAGAGgta  
318 M F V M W L D A V T Y L H H H G H D D K L P W Y R G E  
1801 taccgttcaaatccttttgagttttggtgtggaatttccaagaacatcacaccataaaatgatctgttttacaccattttattaacttct  
1891 ctgcttctgcacttgatgatcaaacagGAATGGAGTTACCTAAGAGGAGGATTAACGACCCTTGATCGTGATTACGGATGGATCAACAAC  
345 E W S Y L R G G L T T L D R D Y G W I N N  
1981 ATCCATCATGACATTGGAACCTCAGTCGTTCCATCTCTTCCCTCAAATCCACACTATCACTTAATAGAAGCAgtgagtattcctctc  
366 I H H D I G T H V V H H L F P Q I P H Y H L I E A  
2071 agccctgcatctgaaattcaaaccttaattttcttctatataatcgaaatcctcatcctaacaagtgcaaaacttctcgtgtagACCGAGG  
391 T E  
2161 CAACGAAGCCGATATTCGGGAAGTATTATAGGGAACCAGAGAAATCTTGGCCTCTCCCATTTCACTTATTAGGAGTCTTGTAAGAAGCC  
393 A T K P I F G K Y Y R E P E K S W P L P F H L L G V L V R S  
2251 TAAGAAAGGATCACTTCGTGAGCGATTCTGGAGATATCGTATATTATCAAACAGACCCGACCTGCTTGTCAAAGCAACAATTAAG  
423 L R K D H F V S D S G D I V Y Y Q T D P D L S \*  
2341 TTATGTTTCACTTCTTCAACTATTACACATCCAAATTTCTTTCGCAATAGCTCGCGAGCCACTCGAGTTTAAATATGATCAGCTGCCAA  
2431 AGAAGCCGTTGTTCAATGATAGTATTATGCTTTTTAGGGTCTTTAGAGTTGCATATTATTATAGCCACATGAAAGAAAAAGTTGGCAT  
2521 TGTTTTGCTTGAAGTACGTTAATAAACTACTAGTGAACCACAATGCTATTAAATTTATATGGGATGAGTTGAATTTTTTTTATTGTT  
2611 CTTAAAT

S1 Fig. Nucleic acid sequences and the deduced amino acid sequences of 23 cucumber *FAD* genes.
